# Supplementary material
Source: ML conference proceedings conference paper supplement (https://proceedings.neurips.cc/paper_files/paper/2020/hash/cebd648f9146a6345d604ab093b02c73-Abstract.html)
Supplement: Supplementary file [file cebd648f9146a6345d604ab093b02c73-Supplemental.pdf]

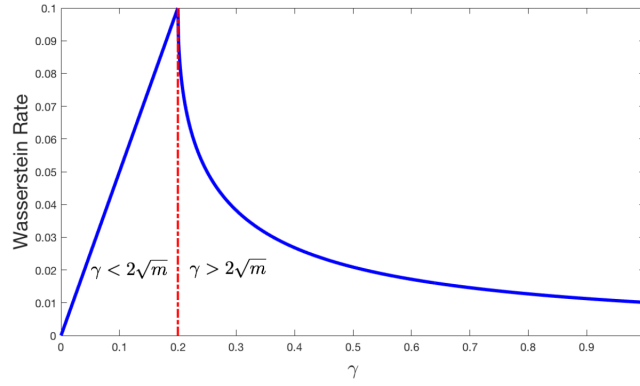

Figure 1: The norm  $\|e^{-tH_\gamma}\|$  is optimized for the choice of  $\gamma = 2\sqrt{m}$ . This is illustrated in the figure for  $m = 0.01$ .

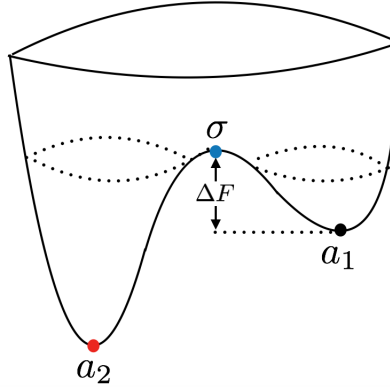

Figure 2: A double-well example. Here,  $\Delta F = F(\sigma) - F(a_1)$ . There are exactly two local minima  $a_1$  and  $a_2$  which are separated with a saddle point  $\sigma$ .

## 440 **B Proof of results in Section 2**

### 441 **B.1 Proof of Lemma 2**

442 *Proof.* Let  $H$  be a symmetric positive definite matrix with eigenvalue decomposition  $H = QDQ^T$ ,  
 443 where  $D$  is diagonal with eigenvalues in increasing order  $m := \lambda_1 \leq \lambda_2 \leq \dots \leq \lambda_d =: M$  of the  
 444 matrix  $H$ . Recall  $H_\gamma$  from (2.2). Note that

$$H_\gamma = \begin{bmatrix} Q & 0 \\ 0 & Q \end{bmatrix} G_\gamma \begin{bmatrix} Q^T & 0 \\ 0 & Q^T \end{bmatrix}, \quad G_\gamma := \begin{bmatrix} \gamma I & D \\ -I & 0 \end{bmatrix}.$$

445 Therefore  $H_\gamma$  and  $G_\gamma$  have the same eigenvalues. Due to the structure of  $G_\gamma$ , it can be seen that there  
 446 exists a permutation matrix  $P$  such that

$$T_\gamma := PG_\gamma P^T = \begin{bmatrix} T_1(\gamma) & 0 & 0 & 0 \\ 0 & T_2(\gamma) & 0 & 0 \\ \vdots & \dots & \ddots & \vdots \\ 0 & 0 & 0 & T_d(\gamma) \end{bmatrix}, \quad \text{where } T_i(\gamma) := \begin{bmatrix} \gamma & \lambda_i \\ -1 & 0 \end{bmatrix}, \quad (\text{B.1})$$

447 with  $i = 1, 2, \dots, d$ , and  $T_i(\gamma)$  are  $2 \times 2$  block matrices with the eigenvalues:

$$\mu_{i,\pm} := \frac{\gamma \pm \sqrt{\gamma^2 - 4\lambda_i}}{2}. \quad i = 1, 2, \dots, d. \quad (\text{B.2})$$

448 We observe that  $T_\gamma$  and  $G_\gamma$  (and therefore  $H_\gamma$ ) have the same eigenvalues and the eigenvalues of  $T_\gamma$   
 449 are determined by the eigenvalues of the  $2 \times 2$  block matrices  $T_i(\gamma)$ .

450 Since  $H_\gamma$  is unitarily equivalent to the matrix  $T_\gamma$ , i.e. there exists a unitary matrix  $U$  such that  
 451  $H_\gamma = UT_\gamma U^*$ , we have  $\|e^{-tH_\gamma}\| = \|Ue^{-tT_\gamma}U^*\| = \|e^{-tT_\gamma}\|$ . Since  $T_\gamma$  is a block diagonal matrix  
 452 with  $2 \times 2$  blocks  $T_i(\gamma)$  we have  $\|e^{-tT_\gamma}\| = \max_{1 \leq i \leq d} \|e^{-tT_i(\gamma)}\|$ . Assume that  $\gamma^2 - 4\lambda_1 =$   
 453  $\gamma^2 - 4m \leq 0$  so that the eigenvalues  $\mu_{i,\pm}$  of  $T_i(\gamma)$  (see Eqn. (B.2)) are real when  $\gamma = 2\sqrt{m}$  and  
 454 complex when  $\lambda < 2\sqrt{m}$ . Note that

$$\|e^{-tT_i(\gamma)}\| = e^{-t\gamma/2} \|e^{-t\tilde{T}_i(\gamma)}\|, \quad \text{where } \tilde{T}_i(\gamma) := T_i(\gamma) - \frac{\gamma}{2}I, \quad 1 \leq i \leq d. \quad (\text{B.3})$$

455 We consider  $\gamma \in (0, 2\sqrt{m}]$ . Depending on the value of  $\lambda_i$  and  $\gamma$ , there are two cases:

456 **Case 1.** If  $\gamma < 2\sqrt{m}$  or ( $\lambda_i > m$  and  $\gamma = 2\sqrt{m}$ ), then  $\tilde{T}_i(\gamma)$  has purely imaginary eigenvalues  
 457 that are complex conjugates which we denote by  $\tilde{\mu}_{i,\pm} = \pm i\frac{\sqrt{4\lambda_i - \gamma^2}}{2}$ ,  $1 \leq i \leq d$ . We will show  
 458 that the last term in (B.3) stays bounded due to the imaginarity of the eigenvalues of  $\tilde{T}_i(\gamma)$ . It  
 459 is easy to check that  $2 \times 2$  matrix  $\tilde{T}_i(\gamma)$  have the eigenvectors  $v_{i,\pm} = [\mu_{i,\pm}, -1]^T$ . If we set  
 460  $G_i := [v_{i,+} \quad v_{i,-}] \in \mathbb{C}^{2 \times 2}$ , the eigenvalue decomposition of  $\tilde{T}_i(\gamma)$  is given by

$$\tilde{T}_i(\gamma) = G_i \begin{bmatrix} \tilde{\mu}_{i,+} & 0 \\ 0 & \tilde{\mu}_{i,-} \end{bmatrix} G_i^{-1}, \quad \text{where } G_i^{-1} = \frac{1}{\det G_i} \begin{bmatrix} -1 & -\mu_{i,-} \\ 1 & \mu_{i,+} \end{bmatrix},$$

461 and  $\det G_i = i\sqrt{4\lambda_i - \gamma^2}$ . We can compute that

$$\begin{aligned} e^{-t\tilde{T}_i(\gamma)} &= G_i \begin{bmatrix} e^{-it\sqrt{4\lambda_i - \gamma^2}/2} & 0 \\ 0 & e^{it\sqrt{4\lambda_i - \gamma^2}/2} \end{bmatrix} G_i^{-1} \\ &= \frac{1}{\det G_i} \begin{bmatrix} \mu_{i,+} & \mu_{i,-} \\ -1 & -1 \end{bmatrix} \begin{bmatrix} -e^{-it\sqrt{4\lambda_i - \gamma^2}/2} & -\mu_{i,-}e^{-it\sqrt{4\lambda_i - \gamma^2}/2} \\ e^{it\sqrt{4\lambda_i - \gamma^2}/2} & \mu_{i,+}e^{it\sqrt{4\lambda_i - \gamma^2}/2} \end{bmatrix} \\ &= \frac{1}{i\sqrt{4\lambda_i - \gamma^2}} \begin{bmatrix} 2\text{Imag}(\mu_{i,-}e^{it\sqrt{4\lambda_i - \gamma^2}/2}) & 2i|\mu_{i,+}|^2 \sin(t\sqrt{4\lambda_i - \gamma^2}/2) \\ -2i \sin(t\sqrt{4\lambda_i - \gamma^2}/2) & 2\text{Imag}(\mu_{i,+}e^{it\sqrt{4\lambda_i - \gamma^2}/2}) \end{bmatrix}, \end{aligned}$$

462 where  $\text{Imag}(a + ib) := ib$  denotes the imaginary part of a complex number. As a consequence, by  
 463 taking componentwise absolute values

$$\begin{aligned} \|e^{-t\tilde{T}_i(\gamma)}\| &\leq \frac{1}{\sqrt{4\lambda_i - \gamma^2}} \left\| \begin{bmatrix} 2|\mu_{i,-}| & 2|\mu_{i,+}|^2 \\ 2 & 2|\mu_{i,+}| \end{bmatrix} \right\| = \frac{1}{\sqrt{4\lambda_i - \gamma^2}} \left\| \begin{bmatrix} 2\sqrt{\lambda_i} & 2\lambda_i \\ 2 & 2\sqrt{\lambda_i} \end{bmatrix} \right\| \\ &= \frac{1}{\sqrt{4\lambda_i - \gamma^2}} \left\| \begin{bmatrix} 2\sqrt{\lambda_i} \\ 2 \end{bmatrix} \begin{bmatrix} 1 & \sqrt{\lambda_i} \end{bmatrix} \right\| = \frac{1}{\sqrt{4\lambda_i - \gamma^2}} \left\| \begin{bmatrix} 2\sqrt{\lambda_i} \\ 2 \end{bmatrix} \right\| \|[1 \quad \sqrt{\lambda_i}]\| \\ &= \frac{2(1 + \lambda_i)}{\sqrt{4\lambda_i - \gamma^2}}, \end{aligned} \quad (\text{B.4})$$

464 where the second from last equality used the fact that the 2-norm of a rank-one matrix is equal  
 465 to its Frobenius norm.<sup>2</sup> Then, it follows from (B.3) that  $\|e^{-tT_i(\gamma)}\| = e^{-t\gamma/2} \|e^{-t\tilde{T}_i(\gamma)}\| \leq$   
 466  $\frac{2(1+\lambda_i)}{\sqrt{4\lambda_i - \gamma^2}} e^{-t\gamma/2}$ , which implies  $\|e^{-tH_\gamma}\| = \|e^{-tT_\gamma}\| \leq \max_{1 \leq i \leq d} \|e^{-tT_i(\gamma)}\| \leq \frac{2(1+M)}{\sqrt{4m - \gamma^2}} e^{-t\gamma/2}$ ,  
 467 provided that  $\gamma^2 - 4m < 0$ . In particular, if we choose  $\hat{\varepsilon} = 1 - \frac{\gamma}{2\sqrt{m}}$  for any  $\hat{\varepsilon} > 0$ , we obtain

$$\|e^{-tH_\gamma}\| \leq \frac{1 + M}{\sqrt{m(1 - (1 - \hat{\varepsilon})^2)}} e^{-\sqrt{m}(1 - \hat{\varepsilon})t}.$$

<sup>2</sup>The 2-norm of a rank-one matrix  $R = uv^*$  should be exactly equal to  $\sigma = \|u\|\|v\|$ . This follows from the fact that we can write  $R = \sigma\tilde{u}\tilde{v}^T$  where  $\tilde{u}$  and  $\tilde{v}$  have unit norm. This would be a singular value decomposition of  $R$ , showing that all the singular values are zero except a singular value at  $\sigma$ . Because the 2-norm is equal to the largest singular value, the 2-norm of  $R$  is equal to  $\sigma$ .

468 The proof for **Case 1** is complete.

**Case 2.** If  $\gamma = 2\sqrt{m}$  and  $\lambda_i = m$ , then  $\tilde{T}_i(\gamma)$  has double eigenvalues at zero and is not diagonalizable. It admits the Jordan decomposition

$$\tilde{T}_i(\gamma) = G_i \begin{bmatrix} 0 & 1 \\ 0 & 0 \end{bmatrix} G_i^{-1} \quad \text{with} \quad G_i = \begin{bmatrix} \sqrt{m} & 1 \\ -1 & 0 \end{bmatrix} \quad \text{and} \quad G_i^{-1} = \begin{bmatrix} 0 & -1 \\ 1 & \sqrt{m} \end{bmatrix}.$$

By a direct computation, we obtain

$$e^{-t\tilde{T}_i(\gamma)} = G_i \begin{bmatrix} 1 & -t \\ 0 & 1 \end{bmatrix} G_i^{-1} = \begin{bmatrix} 1 - t\sqrt{m} & -tm \\ t & 1 + t\sqrt{m} \end{bmatrix}.$$

469 A simple computation reveals

$$\|e^{-t\tilde{T}_i(\gamma)}\| \leq \sqrt{\text{Tr}\left(e^{-t\tilde{T}_i(\gamma)}e^{-t\tilde{T}_i(\gamma)^T}\right)} = \sqrt{2 + (m+1)^2t^2}. \quad (\text{B.5})$$

470 To finish the proof of **Case 2**, let  $\gamma = 2\sqrt{m}$ . We compute

$$\begin{aligned} \max_{1 \leq i \leq d} \|e^{-t\tilde{T}_i(\gamma)}\| &= \max \left\{ \max_{i:\lambda_i=m} \|e^{-t\tilde{T}_i(\gamma)}\|, \max_{i:\lambda_i>m} \|e^{-t\tilde{T}_i(\gamma)}\| \right\} \\ &\leq \max \left\{ \sqrt{2 + (m+1)^2t^2}, \max_{i:\lambda_i>m} \frac{(1 + \lambda_i)}{\sqrt{\lambda_i - m}} \right\}, \end{aligned}$$

471 where we used (B.4) and (B.5) in the last inequality. We conclude from (B.3) for **Case 2**.  $\square$

## 472 **B.2 Proof of Theorem 3**

473 The main result we use to prove Theorem 3 is the following proposition. The proof of the following  
474 result will be presented later in Section B.2.2.

475 **Proposition 7.** Assume  $\gamma = 2\sqrt{m}$ . Fix any  $r > 0$  and

$$0 < \varepsilon < \min \{ \bar{\varepsilon}_1^U, \bar{\varepsilon}_2^U, \bar{\varepsilon}_3^U \},$$

476 where

$$\bar{\varepsilon}_1^U := \sqrt{\frac{C_H + 2 + (m+1)^2}{(C_H + 2)m + (m+1)^2}} r, \quad (\text{B.6})$$

$$\bar{\varepsilon}_2^U := 2\sqrt{2} (C_H + 2 + (m+1)^2)^{1/4} \frac{e^{-1/2r}}{m^{1/4}}, \quad (\text{B.7})$$

$$\bar{\varepsilon}_3^U := \frac{\sqrt{m}}{4L \left( \sqrt{C_H + 2} + \frac{m+1}{\sqrt{m}} + \frac{\sqrt{(C_H+2)m+(m+1)}}{8\sqrt{C_H+2+(m+1)^2}} \right)}. \quad (\text{B.8})$$

477 Consider the stopping time:

$$\tau := \inf \left\{ t \geq 0 : \|X(t) - x_*\| \geq \varepsilon + re^{-\sqrt{m}t} \right\}.$$

478 For any initial point  $X(0) = x$  with  $\|x - x_*\| \leq r$ , and

$$\beta \geq \frac{256(2C_H m + 4m + (m+1)^2)}{m\varepsilon^2} \left( d \log(2) + \log \left( \frac{2\|H_{2\sqrt{m}}\|\mathcal{T} + 1}{\delta} \right) \right),$$

479 we have

$$\mathbb{P}_x (\tau \in [\mathcal{T}_{rec}^U, \mathcal{T}_{esc}^U]) \leq \delta.$$

480 We are now ready to complete the proof of Theorem 3.

481 **B.2.1 Completing the proof of Theorem 3**

482 Assume that  $\gamma = 2\sqrt{m}$ . Let us compare the discrete dynamics (1.7)-(1.8) and the continuous  
483 dynamics (1.4)-(1.5). Define:

$$\tilde{V}(t) = V_0 - \int_0^t \gamma \tilde{V}(\lfloor s/\eta \rfloor \eta) ds - \int_0^t \nabla F(\tilde{X}(\lfloor s/\eta \rfloor \eta)) ds + \sqrt{2\gamma\beta^{-1}} \int_0^t dB_s, \quad (\text{B.9})$$

$$\tilde{X}(t) = X_0 + \int_0^t \tilde{V}(\lfloor s/\eta \rfloor \eta) ds. \quad (\text{B.10})$$

484 The process  $(\tilde{V}, \tilde{X})$  defined in (B.9) and (B.10) is the continuous-time interpolation of the iterates  
485  $\{(V_k, X_k)\}$ . In particular, the joint distribution of  $\{(V_k, X_k) : k = 1, 2, \dots, K\}$  is the same as  
486  $\{(\tilde{V}(t), \tilde{X}(t)) : t = \eta, 2\eta, \dots, K\eta\}$  for any positive integer  $K$ .

487 It is derived in the proof of Lemma EC.6 in [GGZ18] that the relative entropy  $D(\cdot \parallel \cdot)$  between the  
488 law  $\tilde{\mathbb{P}}^{K\eta}$  of  $((\tilde{V}(t), \tilde{X}(t)) : t \leq K\eta)$  and the law  $\mathbb{P}^{K\eta}$  of  $((V(t), X(t)) : t \leq K\eta)$  is upper bounded  
489 as follows:

$$D(\tilde{\mathbb{P}}^{K\eta} \parallel \mathbb{P}^{K\eta}) \leq \frac{3\beta M^2}{2\gamma} K\eta^3 \left( C_v^d + 2M^2 C_x^d + 2B^2 + \frac{2d\gamma\beta^{-1}}{3} \right),$$

490 provided that  $\eta \leq \min \left\{ 1, \frac{\gamma}{K_2} (d/\beta + \bar{A}/\beta), \frac{\gamma\lambda}{2K_1} \right\}$ , where  $C_v^d$  is defined in Lemma 10. Using  
491 Pinsker's inequality, we obtain an upper bound on the total variation  $\|\cdot\|_{TV}$ :

$$\|\tilde{\mathbb{P}}^{K\eta} - \mathbb{P}^{K\eta}\|_{TV}^2 \leq \frac{3\beta M^2}{4\gamma} K\eta^3 \left( C_v^d + 2M^2 C_x^d + 2B^2 + \frac{2d\gamma\beta^{-1}}{3} \right).$$

492 Using a result about an optimal coupling (Theorem 5.2., [Lin92]), that is, given any two random  
493 elements  $\mathcal{X}, \mathcal{Y}$  of a common standard Borel space, there exists a coupling  $\mathcal{P}$  of  $\mathcal{X}$  and  $\mathcal{Y}$  such that

$$\mathcal{P}(\mathcal{X} \neq \mathcal{Y}) \leq \|\mathcal{L}(\mathcal{X}) - \mathcal{L}(\mathcal{Y})\|_{TV}.$$

494 Hence, given any  $\beta > 0$  and  $K\eta \leq \mathcal{T}_{\text{esc}}^U$ , we can choose

$$\eta^2 \leq \frac{4\gamma\delta^2}{3\beta M^2 (C_v^d + 2M^2 C_x^d + 2B^2 + \frac{2d\gamma\beta^{-1}}{3}) \mathcal{T}_{\text{esc}}^U}, \quad (\text{B.11})$$

495 so that there is a coupling of  $\{(V(k\eta), X(k\eta)) : k = 1, 2, \dots, K\}$  and  $\{(V_k, X_k) : k = 1, 2, \dots, K\}$   
496 such that

$$\mathcal{P}(((V(\eta), X(\eta)), \dots, (V(K\eta), X(K\eta))) \neq ((V_1, X_1), \dots, (V_K, X_K))) \leq \delta. \quad (\text{B.12})$$

497 It follows that

$$\mathbb{P}(((V_1, X_1), \dots, (V_K, X_K)) \in \cdot) \leq \mathbb{P}(((V(\eta), X(\eta)), \dots, (V(K\eta), X(K\eta))) \in \cdot) + \delta.$$

498 Let us now complete the proof of Theorem 3. We need to show that

$$\mathbb{P}((X_1, \dots, X_K) \in \mathcal{A}) \leq \delta,$$

499 where  $K = \lfloor \eta^{-1} \mathcal{T}_{\text{esc}}^U \rfloor$  and  $\mathcal{A} := \mathcal{A}_1 \cap \mathcal{A}_2$ , where

$$\mathcal{A}_1 := \left\{ (x_1, \dots, x_K) \in (\mathbb{R}^d)^K : \max_{k \leq \eta^{-1} \mathcal{T}_{\text{rec}}^U} \frac{\|x_k - x_*\|}{\varepsilon + re^{-\sqrt{mk}\eta}} \leq \frac{1}{2} \right\},$$

$$\mathcal{A}_2 := \left\{ (x_1, \dots, x_K) \in (\mathbb{R}^d)^K : \max_{\eta^{-1} \mathcal{T}_{\text{rec}}^U \leq k \leq K} \frac{\|x_k - x_*\|}{\varepsilon + re^{-\sqrt{mk}\eta}} \geq 1 \right\}.$$

500 We can choose  $\beta$  sufficiently large so that with probability at least  $1 - \delta/3$ , we have either  $\|X(t) -$   
501  $x_*\| \geq \varepsilon + re^{-\sqrt{mt}}$  for some  $t \leq \mathcal{T}_{\text{rec}}^U$  or  $\|X(t) - x_*\| \leq \varepsilon + re^{-\sqrt{mt}}$  for all  $t \leq \mathcal{T}_{\text{esc}}^U$ . Moreover, for any  
502  $K, \eta$  and  $\beta$  satisfying the conditions of the theorem, there exists a coupling of  $(X(\eta), \dots, X(K\eta))$   
503 and  $(X_1, \dots, X_K)$  so that with probability  $1 - \delta/3$ ,  $X_k = X(k\eta)$  for all  $k = 1, 2, \dots, K$ . Then, by  
504 (B.11) and (B.12), we get

$$\mathbb{P}((X_1, \dots, X_K) \in \mathcal{A}) \leq \mathbb{P}((X(\eta), \dots, X(K\eta)) \in \mathcal{A}) + \frac{\delta}{3}, \quad (\text{B.13})$$

505 provided that

$$\eta \leq \bar{\eta}_3^U := \frac{2\gamma^{1/2}\delta}{3\sqrt{3}\beta M(C_v^d + 2M^2C_x^d + 2B^2 + \frac{2d\gamma\beta^{-1}}{3})^{1/2}(\mathcal{T}_{\text{esc}}^U)^{1/2}}. \quad (\text{B.14})$$

506 It remains to estimate the probability of  $\mathbb{P}((X(\eta), \dots, X(K\eta)) \in \mathcal{A}_1 \cap \mathcal{A}_2)$  for the underdamped  
 507 Langevin diffusion. Partition the interval  $[0, \mathcal{T}_{\text{rec}}^U]$  using the points  $0 = t_1 < t_1 < \dots < t_{\lceil \eta^{-1} \mathcal{T}_{\text{rec}}^U \rceil} =$   
 508  $\mathcal{T}_{\text{rec}}^U$  with  $t_k = k\eta$  for  $k = 0, 1, \dots, \lceil \eta^{-1} \mathcal{T}_{\text{rec}}^U \rceil - 1$ , and consider the event:

$$\mathcal{B} := \left\{ \max_{0 \leq k \leq \lceil \eta^{-1} \mathcal{T}_{\text{rec}}^U \rceil - 1} \max_{t \in [t_k, t_{k+1}]} \|X(t) - X(t_{k+1})\| \leq \frac{\varepsilon}{2} \right\}.$$

509 On the event  $\{(X(\eta), \dots, X(K\eta)) \in \mathcal{A}_1\} \cap \mathcal{B}$ ,

$$\begin{aligned} \sup_{t \in [0, \mathcal{T}_{\text{rec}}^U]} \frac{\|X(t) - x_*\|}{\varepsilon + re^{-\sqrt{m}t}} &= \max_{0 \leq k \leq \lceil \eta^{-1} \mathcal{T}_{\text{rec}}^U \rceil - 1} \sup_{t \in [t_k, t_{k+1}]} \frac{\|X(t) - x_*\|}{\varepsilon + re^{-\sqrt{m}t}} \\ &\leq \frac{1}{2} + \max_{0 \leq k \leq \lceil \eta^{-1} \mathcal{T}_{\text{rec}}^U \rceil - 1} \max_{t \in [t_k, t_{k+1}]} \frac{1}{\varepsilon} \|X(t) - X(t_{k+1})\| < 1, \end{aligned}$$

510 and thus

$$\begin{aligned} \mathbb{P}((X(\eta), \dots, X(K\eta)) \in \mathcal{A}) &\leq \mathbb{P}(\{(X(\eta), \dots, X(K\eta)) \in \mathcal{A}\} \cap \mathcal{B}) + \mathbb{P}(\mathcal{B}^c) \\ &\leq \mathbb{P}(\tau \in [\mathcal{T}_{\text{rec}}^U, \mathcal{T}_{\text{esc}}^U]) + \mathbb{P}(\mathcal{B}^c) \\ &\leq \frac{\delta}{3} + \mathbb{P}(\mathcal{B}^c), \end{aligned} \quad (\text{B.15})$$

511 provided that (by applying Proposition 7 and Lemma 18) (with  $\gamma = 2\sqrt{m}$ ):

$$\beta \geq \beta_{-1}^U := \frac{256(2C_H m + 4m + (m+1)^2)}{m\varepsilon^2} \left( d \log(2) + \log \left( \frac{6\sqrt{4m + M^2 + 1\mathcal{T}} + 3}{\delta} \right) \right). \quad (\text{B.16})$$

512 To complete the proof, we need to show that  $\mathbb{P}(\mathcal{B}^c) \leq \frac{\delta}{3}$  in view of (B.13) and (B.15). For any  
 513  $t \in [t_k, t_{k+1}]$ , where  $t_{k+1} - t_k = \eta$ , we have

$$\|X(t) - X(t_{k+1})\| \leq \int_t^{t_{k+1}} \|V(s)\| ds \leq \eta \|V(t_{k+1})\| + \int_t^{t_{k+1}} \|V(s) - V(t_{k+1})\| ds, \quad (\text{B.17})$$

514 and

$$\begin{aligned} &\|V(t) - V(t_{k+1})\| \\ &\leq \gamma \int_t^{t_{k+1}} \|V(s)\| ds + \int_t^{t_{k+1}} \|\nabla F(X(s))\| ds + \sqrt{2\gamma\beta^{-1}} \|B_t - B_{t_{k+1}}\| \\ &\leq \gamma \eta \|V(t_{k+1})\| + \gamma \int_t^{t_{k+1}} \|V(s) - V(t_{k+1})\| ds \\ &\quad + M \int_t^{t_{k+1}} \|X(s) - X(t_{k+1})\| ds + \eta \|\nabla F(X(t_{k+1}))\| + \sqrt{2\gamma\beta^{-1}} \|B_t - B_{t_{k+1}}\| \\ &\leq \gamma \eta \|V(t_{k+1})\| + \gamma \int_t^{t_{k+1}} \|V(s) - V(t_{k+1})\| ds \\ &\quad + M \int_t^{t_{k+1}} \|X(s) - X(t_{k+1})\| ds + M\eta \|X(t_{k+1})\| + B\eta + \sqrt{2\gamma\beta^{-1}} \|B_t - B_{t_{k+1}}\|, \end{aligned} \quad (\text{B.18})$$

515 where the second inequality above used  $M$ -Lipschitz property of  $\nabla F$  and the last inequality above  
 516 used Lemma 20. By adding the above two inequalities (B.17) and (B.18) together, we get

$$\begin{aligned}
 & \|X(t) - X(t_{k+1})\| + \|V(t) - V(t_{k+1})\| \\
 & \leq (1 + \gamma)\eta\|V(t_{k+1})\| + (1 + \gamma) \int_t^{t_{k+1}} \|V(s) - V(t_{k+1})\| ds \\
 & \quad + M \int_t^{t_{k+1}} \|X(s) - X(t_{k+1})\| ds + M\eta\|X(t_{k+1})\| + B\eta + \sqrt{2\gamma\beta^{-1}}\|B_t - B_{t_{k+1}}\| \\
 & \leq (1 + \gamma + M) \int_t^{t_{k+1}} (\|V(s) - V(t_{k+1})\| + \|X(s) - X(t_{k+1})\|) ds \\
 & \quad + (1 + \gamma)\eta\|V(t_{k+1})\| + M\eta\|X(t_{k+1})\| + B\eta + \sqrt{2\gamma\beta^{-1}} \sup_{t \in [t_k, t_{k+1}]} \|B_t - B_{t_{k+1}}\|.
 \end{aligned}$$

517 By applying Gronwall's inequality, we get

$$\begin{aligned}
 & \sup_{t \in [t_k, t_{k+1}]} [\|X(t) - X(t_{k+1})\| + \|V(t) - V(t_{k+1})\|] \\
 & \leq e^{(1+\gamma+M)\eta} \left[ (1 + \gamma)\eta\|V(t_{k+1})\| + M\eta\|X(t_{k+1})\| + B\eta + \sqrt{2\gamma\beta^{-1}} \sup_{t \in [t_k, t_{k+1}]} \|B_t - B_{t_{k+1}}\| \right].
 \end{aligned} \tag{B.19}$$

518 We have from Lemma 10 that for any  $u > 0$ ,

$$\mathbb{P}(\|V(t_{k+1})\| \geq u) \leq \frac{\sup_{t>0} \mathbb{E}\|V(t)\|^2}{u^2} \leq \frac{C_v^c}{u^2}, \tag{B.20}$$

519 and

$$\mathbb{P}(\|X(t_{k+1})\| \geq u) \leq \frac{\sup_{t>0} \mathbb{E}\|X(t)\|^2}{u^2} \leq \frac{C_x^c}{u^2}, \tag{B.21}$$

520 where  $C_v^c, C_x^c$  are defined in Lemma 10. By Lemma 19, we have

$$\mathbb{P} \left( \sup_{t \in [t_k, t_{k+1}]} \|B_t - B_{t_{k+1}}\| \geq u \right) \leq 2^{1/4} e^{1/4} e^{-\frac{u^2}{4d\eta}}.$$

521 Therefore, we can infer from (B.19) that with  $K_0 := \lceil \eta^{-1} \mathcal{T}_{\text{rec}}^U \rceil$ ,

$$\begin{aligned}
 & \mathbb{P}(\mathcal{B}^c) \\
 & \leq \sum_{k=0}^{K_0-1} \mathbb{P} \left( \|X(t_{k+1})\| \geq \frac{\varepsilon e^{-(1+\gamma+M)\eta}}{8M\eta} \right) + \sum_{k=0}^{K_0-1} \mathbb{P} \left( \|V(t_{k+1})\| \geq \frac{\varepsilon e^{-(1+\gamma+M)\eta}}{8(1+\gamma)\eta} \right) \\
 & \quad + \sum_{k=0}^{K_0-1} \mathbb{P} \left( B \geq \frac{\varepsilon e^{-(1+\gamma+M)\eta}}{8\eta} \right) + \sum_{k=0}^{K_0-1} \mathbb{P} \left( \sup_{t \in [t_k, t_{k+1}]} \|B_t - B_{t_{k+1}}\| \geq \frac{\varepsilon e^{-(1+\gamma+M)\eta} \sqrt{\beta}}{8\sqrt{2\gamma}} \right) \\
 & \leq \frac{64K_0}{\varepsilon^2} (M^2 C_x^c + (1 + \gamma)^2 C_v^c) \cdot \eta^2 e^{2(1+\gamma+M)\eta}
 \end{aligned} \tag{B.22}$$

$$+ 2^{1/4} e^{1/4} K_0 \cdot \exp \left( -\frac{1}{4d\eta} \frac{\varepsilon^2 e^{-2(1+\gamma+M)\eta} \beta}{128\gamma} \right) \tag{B.23}$$

$$+ K_0 \mathbb{P} \left( B \geq \frac{\varepsilon e^{-(1+\gamma+M)\eta}}{8\eta} \right), \tag{B.24}$$

522 where the last inequality follows from (B.20), (B.21) and Lemma 19. We can choose  $\eta \leq 1$  so that

$$\eta \leq \bar{\eta}_2^U := \frac{\delta \varepsilon^2 e^{-2(1+\gamma+M)}}{384(M^2 C_x^c + (1 + \gamma)^2 C_v^c) \mathcal{T}_{\text{rec}}^U}, \tag{B.25}$$

523 so that the term in (B.22) is less than  $\delta/6$ , where  $C_v^c, C_x^c$  are defined in Lemma 10, and then we  
 524 choose  $\beta$  so that

$$\beta \geq \underline{\beta}_2^U := \frac{512d\eta\gamma \log(2^{1/4} e^{1/4} 6\delta^{-1} \mathcal{T}_{\text{rec}}^U / \eta)}{\varepsilon^2 e^{-2(1+\gamma+M)\eta}}, \tag{B.26}$$

525 so that the term in (B.23) is also less than  $\delta/6$ , and we can choose  $\eta$  so that  $\eta \leq 1$  and

$$\eta \leq \bar{\eta}_1^U := \frac{\varepsilon e^{-(1+\gamma+M)}}{8B}, \quad (\text{B.27})$$

526 so that the term in (B.24) is zero.

527 To complete the proof, let us work on the leading orders of the constants. For the sake of convenience,  
528 we hide the dependence on  $M$  and  $L$  and assume that  $M, L = \mathcal{O}(1)$ . We also assume that  $C_H = \mathcal{O}(1)$ .  
529 Recall that  $0 < \varepsilon \leq \min\{\bar{\varepsilon}_1^U, \bar{\varepsilon}_2^U, \bar{\varepsilon}_3^U\}$ , where it is easy to check that It is easy to check that

$$\bar{\varepsilon}_1^U = \sqrt{\frac{C_H + 2 + (m+1)^2}{(C_H + 2)m + (m+1)^2}} r \geq \Omega\left(\frac{C_H^{1/2} r}{C_H^{1/2} m^{1/2} + m + 1}\right) \geq \Omega(r),$$

530 where we used  $m \leq M = \mathcal{O}(1)$  and

$$\bar{\varepsilon}_2^U = 2\sqrt{2}(C_H + 2 + (m+1)^2)^{1/4} \frac{e^{-1/2} r}{m^{1/4}} \geq \Omega\left(\frac{(1 + C_H^{1/4})r}{m^{1/4}}\right) \geq \Omega\left(\frac{r}{m^{1/4}}\right),$$

531 and

$$\bar{\varepsilon}_3^U = \frac{\sqrt{m}}{4L\left(\sqrt{C_H + 2} + \frac{m+1}{\sqrt{m}} + \frac{\sqrt{(C_H+2)m+(m+1)}}{8\sqrt{C_H+2+(m+1)^2}}\right)} \geq \Omega\left(\frac{\sqrt{m}}{L\left(1 + \frac{m+1}{\sqrt{m}} + \frac{\sqrt{m}}{m+1}\right)}\right) \geq \Omega(m),$$

532 where we used the fact that  $m+1 \geq 2\sqrt{m}$ . Hence, we can take

$$\varepsilon \leq \min\left\{\mathcal{O}(r), \mathcal{O}\left(\frac{r}{m^{1/4}}\right), \mathcal{O}(m)\right\}.$$

533 Moreover,  $m \leq M = \mathcal{O}(1)$ . Hence, we can take

$$\varepsilon \leq \min\{\mathcal{O}(r), \mathcal{O}(m)\}.$$

534 Next, we recall the recurrence time:

$$\mathcal{T}_{\text{rec}}^U = -\frac{1}{\sqrt{m}} W_{-1}\left(\frac{-\varepsilon^2 \sqrt{m}}{8r^2 \sqrt{C_H + 2 + (m+1)^2}}\right),$$

535 and since  $W_{-1}(-x) \sim \log(1/x)$  for  $x \rightarrow 0^+$ , and we assume  $C_H = \mathcal{O}(1)$ , we get

$$\mathcal{T}_{\text{rec}}^U = \mathcal{O}\left(\frac{1}{\sqrt{m}} \log\left(\frac{r}{\varepsilon m}\right)\right) \leq \mathcal{O}\left(\frac{|\log(m)|}{\sqrt{m}} \log\left(\frac{r}{\varepsilon}\right)\right).$$

536 Next, we recall that stepsize  $\eta$  satisfies  $\eta \leq \min\{1, \bar{\eta}_1^U, \bar{\eta}_2^U, \bar{\eta}_3^U, \bar{\eta}_4^U\}$  and it is easy to check that

$$\bar{\eta}_1^U = \frac{\varepsilon e^{-(1+2\sqrt{m}+M)}}{8B} \geq \Omega\left(\varepsilon e^{-(2m^{1/2}+M)}\right) \geq \Omega(\varepsilon),$$

537 and

$$\bar{\eta}_2^U = \frac{\delta \varepsilon^2 e^{-2(1+2\sqrt{m}+M)}}{384(M^2 C_x^c + (1 + 2\sqrt{m})^2 C_v^c) \mathcal{T}_{\text{rec}}^U} \geq \Omega\left(\frac{\delta \varepsilon^2 e^{-(4m^{1/2}+2M)}}{(M^2 C_x^c + (1 + m) C_v^c) \mathcal{T}_{\text{rec}}^U}\right).$$

538 Moreover, we have (note that  $R = \sqrt{b/m}$  in the definition of  $C_x^c, C_v^c$ )

$$C_x^c \leq \mathcal{O}\left(\frac{1 + \frac{1}{m} + \frac{d}{\beta}}{m}\right), \quad C_v^c \leq \mathcal{O}\left(1 + \frac{1}{m} + \frac{d}{\beta}\right),$$

539 together with  $m \leq M = \mathcal{O}(1)$  implies that

$$\bar{\eta}_2^U = \frac{\delta \varepsilon^2 e^{-2(1+2\sqrt{m}+M)}}{384(M^2 C_x^c + (1 + 2\sqrt{m})^2 C_v^c) \mathcal{T}_{\text{rec}}^U} \geq \Omega\left(\frac{m^2 \beta \delta \varepsilon^2}{(md + \beta) \mathcal{T}_{\text{rec}}^U}\right).$$

540 Moreover,

$$\bar{\eta}_3^U = \frac{2\sqrt{2}m^{1/4}\delta}{3\sqrt{3}\beta M(C_v^d + 2M^2C_x^d + 2B^2 + \frac{4d\sqrt{m}\beta^{-1}}{3})^{1/2}(\mathcal{T}_{\text{esc}}^U)^{1/2}} \geq \Omega\left(\frac{m^{5/4}\delta}{(d+\beta)^{1/2}(\mathcal{T}_{\text{esc}}^U)^{1/2}}\right),$$

541 where we used  $C_x^d \leq \mathcal{O}\left(\frac{d+\beta}{\beta m^2}\right)$  and  $C_v^d \leq \mathcal{O}\left(\frac{d+\beta}{\beta m}\right)$ , and

$$\bar{\eta}_4^U = \min\left\{1, \frac{2\sqrt{m}}{\hat{K}_2} \frac{d+\bar{A}}{\beta}, \frac{\sqrt{m}\lambda}{\hat{K}_1}\right\} \geq \min\left\{\Omega\left(\frac{m^{1/2}(d+\beta)}{dm^{1/2}+\beta}\right), \Omega(m^{5/2})\right\},$$

542 where we used  $\lambda = \Omega(m)$ ,  $\bar{A} = \Omega(\beta)$ ,  $K_1 = \mathcal{O}\left(\frac{1}{\beta m}\right)$ ,  $K_2 = \mathcal{O}(1)$ ,  $\hat{K}_1 = \mathcal{O}\left(\frac{1}{m}\right)$ ,  $\hat{K}_2 = \mathcal{O}(1 +$

543  $\frac{d}{\beta}\sqrt{m})$ , and the minimum between  $\frac{m^{1/2}(d+\beta)}{dm^{1/2}+\beta}$  and  $m^{5/2}$  is  $m^{5/2}$ . Hence, we can take

$$\eta \leq \min\left\{\mathcal{O}(\varepsilon), \mathcal{O}\left(\frac{m^2\beta\delta\varepsilon^2}{(md+\beta)\mathcal{T}_{\text{rec}}^U}\right), \mathcal{O}\left(\frac{m^{5/4}\delta}{(d+\beta)^{1/2}(\mathcal{T}_{\text{esc}}^U)^{1/2}}\right), \mathcal{O}(m^{5/2})\right\}.$$

544 Finally,  $\beta$  satisfies  $\beta \geq \max\{\underline{\beta}_1^U, \underline{\beta}_2^U\}$ , and We have

$$\begin{aligned} \underline{\beta}_1^U &= \frac{256(2C_H m + 4m + (m+1)^2)}{m\varepsilon^2} \left(d \log(2) + \log\left(\frac{6(4m + M^2 + 1)^{1/2}\mathcal{T} + 3}{\delta}\right)\right) \\ &\leq \mathcal{O}\left(\frac{d + \log((\mathcal{T} + 1)/\delta)}{m\varepsilon^2}\right), \end{aligned}$$

545 and

$$\underline{\beta}_2^U = \frac{1024d\eta\sqrt{m}\log(2^{1/4}e^{1/4}6\delta^{-1}\mathcal{T}_{\text{rec}}^U/\eta)}{\varepsilon^2 e^{-2(1+2\sqrt{m}+M)\eta}} \leq \mathcal{O}\left(\frac{d\eta m^{1/2}\log(\delta^{-1}\mathcal{T}_{\text{rec}}^U/\eta)}{\varepsilon^2}\right),$$

546 where we used  $e^{2(1+2\sqrt{m}+M)\eta} = e^{\mathcal{O}(\varepsilon)} = \mathcal{O}(1)$ .

547 Hence, we can take

$$\beta \geq \max\left\{\Omega\left(\frac{d + \log((\mathcal{T} + 1)/\delta)}{m\varepsilon^2}\right), \Omega\left(\frac{d\eta m^{1/2}\log(\delta^{-1}\mathcal{T}_{\text{rec}}^U/\eta)}{\varepsilon^2}\right)\right\}.$$

548 The proof is now complete.

## 549 B.2.2 Proof of Proposition 7

550 In this section, we focus on the proof of Proposition 7. We adopt some ideas from [BG03, TLR18].

551 We recall  $x_*$  is a local minimum of  $F$  and  $H$  is the Hessian matrix:  $H = \nabla^2 F(x_*)$ , and we write

$$X(t) = Y(t) + x_*.$$

552 Thus, we have the decomposition

$$\nabla F(X(t)) = HY(t) - \rho(Y(t)),$$

553 where  $\|\rho(Y(t))\| \leq \frac{1}{2}L\|Y(t)\|^2$  since the Hessian of  $F$  is  $L$ -Lipschitz (Lemma 1.2.4. [Nes13]).

554 Then, we have

$$\begin{aligned} dV(t) &= -\gamma V(t)dt - (H(Y(t)) - \rho(Y(t)))dt + \sqrt{2\gamma\beta^{-1}}dB_t, \\ dY(t) &= V(t)dt. \end{aligned}$$

555 We can write it in terms of matrix form as:

$$d\begin{bmatrix} V(t) \\ Y(t) \end{bmatrix} = \begin{bmatrix} -\gamma I & -H \\ I & 0 \end{bmatrix} \begin{bmatrix} V(t) \\ Y(t) \end{bmatrix} dt + \sqrt{2\gamma\beta^{-1}} \begin{bmatrix} I & 0 \\ 0 & 0 \end{bmatrix} dB_t^{(2)} + \begin{bmatrix} \rho(V(t)) \\ 0 \end{bmatrix} dt,$$

556 where  $B_t^{(2)}$  is a  $2d$ -dimensional standard Brownian motion. Therefore, we have

$$\begin{bmatrix} V(t) \\ Y(t) \end{bmatrix} = e^{-tH_\gamma} \begin{bmatrix} V(0) \\ Y(0) \end{bmatrix} + \sqrt{2\gamma\beta^{-1}} \int_0^t e^{(s-t)H_\gamma} I^{(2)} dB_s^{(2)} + \int_0^t e^{(s-t)H_\gamma} \begin{bmatrix} \rho(V(s)) \\ 0 \end{bmatrix} ds,$$



557 where

$$H_\gamma = \begin{bmatrix} \gamma I & H \\ -I & 0 \end{bmatrix}, \quad I^{(2)} = \begin{bmatrix} I & 0 \\ 0 & 0 \end{bmatrix}. \quad (\text{B.28})$$

558 Given  $0 \leq t_0 \leq t_1$ , we define the matrix flow

$$Q_{t_0}(t) := e^{(t_0-t)H_\gamma} \quad (\text{B.29})$$

559 and we also define

$$Z(t) := e^{(t-t_0)H_\gamma} \begin{bmatrix} V(t) \\ Y(t) \end{bmatrix} = Z_t^0 + Z_t^1,$$

560 where

$$Z_t^0 = e^{-t_0 H_\gamma} \begin{bmatrix} V(0) \\ Y(0) \end{bmatrix} + \sqrt{2\gamma\beta^{-1}} \int_0^t e^{(s-t_0)H_\gamma} I^{(2)} dB_s^{(2)}, \quad (\text{B.30})$$

$$Z_t^1 = \int_0^t e^{(s-t_0)H_\gamma} \begin{bmatrix} \rho(V(s)) \\ 0 \end{bmatrix} ds. \quad (\text{B.31})$$

561 Note that

$$Q_{t_0}(t_1)Z_t^0 = e^{-t_1 H_\gamma} \begin{bmatrix} V(0) \\ Y(0) \end{bmatrix} + \sqrt{2\gamma\beta^{-1}} \int_0^t e^{(s-t_1)H_\gamma} I^{(2)} dB_s^{(2)}$$

562 is a martingale. Before we proceed to the proof of Proposition 7, we state the following lemma,  
563 which will be used in the proof of Proposition 7.

564 **Lemma 8.** Assume  $\gamma = 2\sqrt{m}$ . Define:

$$\mu_t := e^{-tH_\gamma} (V(0), Y(0))^T, \quad (\text{B.32})$$

$$\Sigma_t := 2\gamma\beta^{-1} \int_0^t e^{(s-t)H_\gamma} I^{(2)} e^{(s-t)H_\gamma^T} ds. \quad (\text{B.33})$$

565 For any  $\theta \in \left(0, \frac{2m\sqrt{m}}{\gamma(2C_H m + 4m + (m+1)^2)}\right)$ , and  $h > 0$  and any  $(V(0), Y(0))$ ,

$$\begin{aligned} & \mathbb{P} \left( \sup_{t_0 \leq t \leq t_1} \|Q_{t_0}(t_1)Z_t^0\| \geq h \right) \\ & \leq \left( 1 - \theta \frac{\gamma(2C_H m + 4m + (m+1)^2)}{2m\sqrt{m}} \right)^{-d} e^{-\frac{\beta\theta}{2} [h^2 - \langle \mu_{t_1}, (I - \beta\theta\Sigma_{t_1})^{-1} \mu_{t_1} \rangle]}. \end{aligned}$$

566 Finally, let us complete the proof of Proposition 7.

567 *Proof of Proposition 7.* Since  $\|Y(0)\| = \|X(0) - x_*\| \leq r$ , we know that  $\tau > 0$ . Fix some  
568  $\mathcal{T}_{\text{rec}}^U \leq t_0 \leq t_1$ , such that  $t_1 - t_0 \leq \frac{1}{2\|H_\gamma\|}$ . Then, for every  $t \in [t_0, t_1]$ ,

$$\|Y(t)\| \leq \left\| e^{(t_1-t)H_\gamma} Q_{t_0}(t_1)Z_t \right\| \leq e^{\frac{1}{2}} \|Q_{t_0}(t_1)Z_t\|.$$

569 It follows that (with  $e^{-1/2} \geq 1/2$ )

$$\begin{aligned} & \mathbb{P}(\tau \in [t_0, t_1]) \\ & = \mathbb{P} \left( \sup_{t_0 \leq t \leq t_1 \wedge \tau} \frac{\|Y(t)\|}{\varepsilon + r e^{-\sqrt{m}t}} \geq 1, \tau \geq t_0 \right) \\ & \leq \mathbb{P} \left( \sup_{t_0 \leq t \leq t_1 \wedge \tau} \frac{\|Q_{t_0}(t_1)Z_t\|}{\varepsilon + r e^{-\sqrt{m}t}} \geq \frac{1}{2}, \tau \geq t_0 \right) \\ & \leq \mathbb{P} \left( \sup_{t_0 \leq t \leq t_1 \wedge \tau} \frac{\|Q_{t_0}(t_1)Z_t^0\|}{\varepsilon + r e^{-\sqrt{m}t}} \geq c_0, \tau \geq t_0 \right) + \mathbb{P} \left( \sup_{t_0 \leq t \leq t_1 \wedge \tau} \frac{\|Q_{t_0}(t_1)Z_t^1\|}{\varepsilon + r e^{-\sqrt{m}t}} \geq c_1, \tau \geq t_0 \right), \end{aligned} \quad (\text{B.34})$$

570 where  $c_0 + c_1 = \frac{1}{2}$  and  $c_0, c_1 > 0$ . We will first bound the second term in (B.34) which will turn out  
571 to be zero, and then use Lemma 8 to bound the first term in (B.34).

572 First, notice that  $Z_t^1 \equiv 0$  in the quadratic case and the second term in (B.34) is automatically zero.  
 573 In the more general case, we will show that the second term in (B.34) is also zero. On the event  
 574  $\tau \in [t_0, t_1]$ , for any  $0 \leq s \leq t_1 \wedge \tau$ , we have

$$\|\rho(Y(s))\| \leq \frac{L}{2} \|Y(s)\|^2 \leq \frac{L}{2} \left( \varepsilon + r e^{-\sqrt{m}s} \right)^2.$$

575 Therefore, for any  $t \in [t_0, t_1 \wedge \tau]$ , by Lemma 2, we get

$$\begin{aligned} & \|Q_{t_0}(t_1)Z_t^1\| \\ & \leq \int_0^t \left\| e^{(s-t_1)H_\gamma} \right\| \cdot \|\rho(Y(s))\| ds \\ & \leq \frac{L}{2} \int_0^t \sqrt{C_H + 2 + (m+1)^2(t_1-s)^2} e^{(s-t_1)\sqrt{m}} \left( \varepsilon + r e^{-\sqrt{m}s} \right)^2 ds \\ & \leq L \int_0^t \left( \sqrt{C_H + 2} + (m+1)(t_1-s) \right) e^{(s-t_1)\sqrt{m}} \left( \varepsilon^2 + r^2 e^{-2\sqrt{m}s} \right) ds \\ & \leq L \int_0^{t_1} \left( \sqrt{C_H + 2} + (m+1)(t_1-s) \right) e^{(s-t_1)\sqrt{m}} \left( \varepsilon^2 + r^2 e^{-2\sqrt{m}s} \right) ds \\ & \leq \frac{L}{\sqrt{m}} \left( \left( \sqrt{C_H + 2} + \frac{m+1}{\sqrt{m}} \right) \varepsilon^2 + \sqrt{C_H + 2} r^2 e^{-\sqrt{m}t_1} \right) \\ & \quad + L(m+1)r^2 \int_0^{t_1} (t_1-s) e^{(s-t_1)\sqrt{m}} e^{-2\sqrt{m}s} ds \\ & \leq \frac{L}{\sqrt{m}} \left( \left( \sqrt{C_H + 2} + \frac{m+1}{\sqrt{m}} \right) \varepsilon^2 + \sqrt{C_H + 2} r^2 e^{-\sqrt{m}t_1} + (m+1)r^2 t_1 e^{-t_1\sqrt{m}} \right) \\ & \leq \frac{L}{\sqrt{m}} \left( \left( \sqrt{C_H + 2} + \frac{m+1}{\sqrt{m}} \right) \varepsilon^2 + \left( \sqrt{(C_H + 2)m} + (m+1) \right) r^2 t_1 e^{-t_1\sqrt{m}} \right) \\ & \leq \frac{L}{\sqrt{m}} \left( \sqrt{C_H + 2} + \frac{m+1}{\sqrt{m}} + \frac{\sqrt{(C_H + 2)m} + (m+1)}{8\sqrt{C_H + 2 + (m+1)^2}} \right) \varepsilon^2 \end{aligned}$$

576 where we used  $t_1 \geq t \geq t_0 \geq \mathcal{T}_{\text{rec}}^U \geq \frac{1}{\sqrt{m}}$ , and  $t_1 e^{-t_1\sqrt{m}} \leq \mathcal{T}_{\text{rec}}^U e^{-\mathcal{T}_{\text{rec}}^U \sqrt{m}}$  and the definition of  $\mathcal{T}_{\text{rec}}^U$ :

$$\sqrt{C_H + 2 + (m+1)^2} \mathcal{T}_{\text{rec}}^U e^{-\sqrt{m}\mathcal{T}_{\text{rec}}^U} = \frac{\varepsilon^2}{8r^2}.$$

577 Consequently, if we take  $c_1 = \frac{L}{\sqrt{m}} \left( \sqrt{C_H + 2} + \frac{m+1}{\sqrt{m}} + \frac{\sqrt{(C_H+2)m+(m+1)}}{8\sqrt{C_H+2+(m+1)^2}} \right) \varepsilon$ , then,

$$\sup_{t_0 \leq t \leq t_1 \wedge \tau} \frac{\|Q_{t_0}(t_1)Z_t\|}{\varepsilon + r e^{-\sqrt{m}t}} \leq \frac{1}{\varepsilon} \sup_{t_0 \leq t \leq t_1 \wedge \tau} \|Q_{t_0}(t_1)Z_t\| \leq c_1,$$

578 which implies that

$$\mathbb{P} \left( \sup_{t_0 \leq t \leq t_1 \wedge \tau} \frac{\|Q_{t_0}(t_1)Z_t^1\|}{\varepsilon + r e^{-\sqrt{m}t}} \geq c_1, \tau \geq t_0 \right) = 0.$$

579 Moreover,  $c_0 = \frac{1}{2} - c_1 = \frac{1}{2} - \frac{L}{\sqrt{m}} \left( \sqrt{C_H + 2} + \frac{m+1}{\sqrt{m}} + \frac{\sqrt{(C_H+2)m+(m+1)}}{8\sqrt{C_H+2+(m+1)^2}} \right) \varepsilon > \frac{1}{4}$  since it is

580 assumed that  $\varepsilon < \frac{\sqrt{m}}{4L \left( \sqrt{C_H+2} + \frac{m+1}{\sqrt{m}} + \frac{\sqrt{(C_H+2)m+(m+1)}}{8\sqrt{C_H+2+(m+1)^2}} \right)}$ .

581 Second, we will apply Lemma 8 to bound the first term in (B.34). By using  $V(0) = 0$  and  $\|Y(0)\| \leq r$   
 582 and the definition of  $\mu_{t_1}$  and  $\Sigma_{t_1}$  in (B.32) and (B.33), we get

$$\begin{aligned} & \langle \mu_{t_1}, (I - \beta\theta\Sigma_{t_1})^{-1}\mu_{t_1} \rangle \\ &= \langle e^{-t_1 H_\gamma}(V(0), Y(0))^T, (I - \beta\theta\Sigma_{t_1})^{-1}e^{-t_1 H_\gamma}(V(0), Y(0))^T \rangle \\ &\leq \left(1 - \theta \frac{\gamma(2C_H m + 4m + (m+1)^2)}{2m\sqrt{m}}\right)^{-1} (C_H + 2 + (m+1)^2 t_1^2) e^{-2\sqrt{m}t_1 r^2} \\ &\leq 2((C_H + 2)m + (m+1)^2) t_1^2 e^{-2\sqrt{m}t_1 r^2} \\ &\leq \frac{1}{32} \frac{(C_H + 2)m + (m+1)^2}{C_H + 2 + (m+1)^2} \frac{\varepsilon^4}{r^2} \leq \frac{1}{32} \varepsilon^2, \end{aligned}$$

583 by choosing  $\theta = \frac{m\sqrt{m}}{\gamma(2C_H m + 4m + (m+1)^2)}$  and  $t_1 \geq \mathcal{T}_{\text{rec}}^U \geq \frac{1}{\sqrt{m}}$ , and  $t_1 e^{-t_1 \sqrt{m}} \leq \mathcal{T}_{\text{rec}}^U e^{-\mathcal{T}_{\text{rec}}^U}$ ,  
 584 and using the definition  $\sqrt{C_H + 2 + (m+1)^2} \mathcal{T}_{\text{rec}}^U e^{-\sqrt{m} \mathcal{T}_{\text{rec}}^U} = \frac{\varepsilon^2}{8r^2}$ , and we also used  $\varepsilon \leq$   
 585  $\sqrt{\frac{C_H + 2 + (m+1)^2}{(C_H + 2)m + (m+1)^2}} r$ .

586 Then with the choice of  $h = (\varepsilon + r e^{-\sqrt{m}t_1})c_0$  and  $\theta = \frac{m\sqrt{m}}{\gamma(2C_H m + 4m + (m+1)^2)}$  in Lemma 8, and using  
 587 the fact that  $h = (\varepsilon + r e^{-\sqrt{m}t_1})c_0 \geq \varepsilon c_0$ , we get

$$\begin{aligned} & \mathbb{P}\left(\sup_{t_0 \leq t \leq t_1 \wedge \tau} \frac{\|Q_{t_0}(t_1)Z_t^0\|}{\varepsilon + r e^{-\sqrt{m}t}} \geq c_0, \tau \geq t_0\right) \\ &\leq \mathbb{P}\left(\sup_{t_0 \leq t \leq t_1} \|Q_{t_0}(t_1)Z_t^0\| \geq (\varepsilon + r e^{-\sqrt{m}t_1})c_0\right) \\ &\leq \left(1 - \theta \frac{\gamma(2C_H m + 4m + (m+1)^2)}{2m\sqrt{m}}\right)^{-\frac{2d}{2}} \cdot \exp\left(-\frac{\beta\theta}{2} [h^2 - \langle \mu_{t_1}, (I - \beta\theta\Sigma_{t_1})^{-1}\mu_{t_1} \rangle]\right) \\ &\leq 2^d \cdot \exp\left(-\frac{\beta\gamma^{-1}m\sqrt{m}\varepsilon^2}{2(2C_H + 4m + (m+1)^2)} \left(c_0^2 - \frac{1}{32}\right)\right) \\ &\leq 2^d \cdot \exp\left(-\frac{\beta\gamma^{-1}m\sqrt{m}\varepsilon^2}{128(2C_H + 4m + (m+1)^2)}\right). \end{aligned}$$

588 Thus for any  $t_0 \geq \mathcal{T}_{\text{rec}}^U$  and  $t_0 \leq t_1 \leq t_0 + \frac{1}{2\|H_\gamma\|}$ ,

$$\mathbb{P}(\tau \in [t_0, t_1]) \leq 2^d \cdot \exp\left(-\frac{\beta\gamma^{-1}m\sqrt{m}\varepsilon^2}{128(2C_H m + 4m + (m+1)^2)}\right).$$

589 Fix any  $\mathcal{T} > 0$  and recall the definition of the escape time  $\mathcal{T}_{\text{esc}}^U = \mathcal{T} + \mathcal{T}_{\text{rec}}^U$ . Partition the interval  
 590  $[\mathcal{T}_{\text{rec}}^U, \mathcal{T}_{\text{esc}}^U]$  using the points  $\mathcal{T}_{\text{rec}}^U = t_0 < t_1 < \dots < t_{\lceil 2\|H_\gamma\|\mathcal{T} \rceil} = \mathcal{T}_{\text{esc}}^U$  with  $t_j = j/(2\|H_\gamma\|)$ , then we  
 591 have

$$\begin{aligned} \mathbb{P}(\tau \in [\mathcal{T}_{\text{rec}}^U, \mathcal{T}_{\text{esc}}^U]) &= \sum_{j=0}^{\lceil 2\|H_\gamma\|\mathcal{T} \rceil} \mathbb{P}(\tau \in [t_j, t_{j+1}]) \\ &\leq (2\|H_\gamma\|\mathcal{T} + 1) \cdot 2^d \cdot \exp\left(-\frac{\beta\gamma^{-1}m\sqrt{m}\varepsilon^2}{128(2C_H m + 4m + (m+1)^2)}\right) \leq \delta, \end{aligned}$$

592 provided that

$$\beta \geq \frac{128(2C_H m + 4m + (m+1)^2)\gamma}{m\sqrt{m}\varepsilon^2} \left(d \log(2) + \log\left(\frac{2\|H_\gamma\|\mathcal{T} + 1}{\delta}\right)\right).$$

593 Finally, plugging  $\gamma = 2\sqrt{m}$  into the above formulas and applying the bound on  $\|H_\gamma\|$  from Lemma  
 594 18, the conclusion follows.  $\square$

### 595 B.2.3 Uniform $L^2$ bounds for underdamped Langevin dynamics

596 In this section, we state the uniform  $L^2$  bounds for the continuous time underdamped Langevin  
 597 dynamics ((1.4) and (1.5)) and the discrete time iterates ((1.7) and (1.8)) in Lemma 10, which is a

598 modification of Lemma 8 in [GGZ18]. The uniform  $L^2$  bound for the discrete dynamics (1.7)-(1.8)  
 599 is used to derive the relative entropy to compare the laws of the continuous time dynamics and the  
 600 discrete time dynamics, and the uniform  $L^2$  bound for the continuous dynamics (1.4)-(1.5) is used to  
 601 control the tail of the continuous dynamics in Section B.2.1.

602 Before we proceed, let us first introduce the following Lyapunov function (from the paper [EGZ19])  
 603 which will be used in the proof the uniform  $L^2$  boundedness results for both the continuous and  
 604 discrete underdamped Langevin dynamics. We define the Lyapunov function  $\mathcal{V}$  as:

$$\mathcal{V}(x, v) := \beta F(x) + \frac{\beta}{4} \gamma^2 (\|x + \gamma^{-1}v\|^2 + \|\gamma^{-1}v\|^2 - \lambda \|x\|^2), \quad (\text{B.35})$$

605 and  $\lambda$  is a positive constant less than  $1/4$  according to [EGZ19]. We will first show in the following  
 606 lemma that we can find explicit constants  $\lambda \in (0, \min(1/4, m/(M + \gamma^2/2)))$  and  $\bar{A} \in (0, \infty)$  so  
 607 that the drift condition (B.38) is satisfied. The drift condition is needed in [EGZ19], which is applied  
 608 to obtain the uniform  $L^2$  bounds in [GGZ18] (Lemma 8) that implies the uniform  $L^2$  bounds in our  
 609 current setting (the following Lemma 10).

610 **Lemma 9.** *Let us define:*

$$\lambda = \frac{1}{2} \min(1/4, m/(M + \gamma^2/2)), \quad (\text{B.36})$$

$$\bar{A} = \frac{\beta}{2} \frac{m}{M + \frac{1}{2}\gamma^2} \left( \frac{B^2}{2M + \gamma^2} + \frac{b}{m} \left( M + \frac{1}{2}\gamma^2 \right) + A \right), \quad (\text{B.37})$$

611 *then the following drift condition holds:*

$$x \cdot \nabla F(x) \geq 2\lambda(F(x) + \gamma^2 \|x\|^2/4) - 2\bar{A}/\beta. \quad (\text{B.38})$$

612 The following lemma provides uniform  $L^2$  bounds for the continuous-time underdamped Langevin  
 613 diffusion process  $(X(t), V(t))$  defined in (1.4)-(1.5) and discrete-time underdamped Langevin dy-  
 614 namics  $(X_k, V_k)$  defined in (1.7)-(1.8).

615 **Lemma 10** (Uniform  $L^2$  bounds). *Suppose parts (i), (ii), (iii), (iv) of Assumption 1 and the drift*  
 616 *condition (B.38) hold.  $\gamma > 0$  is arbitrary and  $\lambda, \bar{A}$  are defined in (B.36) and (B.37).*

617 (i) *It holds that*

$$\sup_{t \geq 0} \mathbb{E} \|X(t)\|^2 \leq C_x^c := \frac{\left( \frac{\beta M}{2} + \frac{\beta \gamma^2 (2-\lambda)}{4} \right) R^2 + \beta B R + \beta A + \frac{3}{4} \beta \|V(0)\|^2 + \frac{d+\bar{A}}{\lambda}}{\frac{1}{8}(1-2\lambda)\beta\gamma^2}, \quad (\text{B.39})$$

$$\sup_{t \geq 0} \mathbb{E} \|V(t)\|^2 \leq C_v^c := \frac{\left( \frac{\beta M}{2} + \frac{\beta \gamma^2 (2-\lambda)}{4} \right) R^2 + \beta B R + \beta A + \frac{3}{4} \beta \|V(0)\|^2 + \frac{d+\bar{A}}{\lambda}}{\frac{\beta}{4}(1-2\lambda)}, \quad (\text{B.40})$$

618 (ii) *For any stepsize  $\eta$  satisfying:*

$$0 < \eta \leq \bar{\eta}_4^U := \min \left\{ 1, \frac{\gamma}{\hat{K}_2} (d/\beta + \bar{A}/\beta), \frac{\gamma \lambda}{2\hat{K}_1} \right\}, \quad (\text{B.41})$$

619 *where*

$$\hat{K}_1 := K_1 + Q_1 \frac{4}{1-2\lambda} + Q_2 \frac{8}{(1-2\lambda)\gamma^2}, \quad (\text{B.42})$$

$$\hat{K}_2 := K_2 + Q_3, \quad (\text{B.43})$$

620 *where*

$$K_1 := \max \left\{ \frac{32M^2 \left( \frac{1}{2} + \gamma \right)}{(1-2\lambda)\beta\gamma^2}, \frac{8 \left( \frac{1}{2}M + \frac{1}{4}\gamma^2 - \frac{1}{4}\gamma^2\lambda + \gamma \right)}{\beta(1-2\lambda)} \right\}, \quad (\text{B.44})$$

$$K_2 := 2B^2 \left( \frac{1}{2} + \gamma \right), \quad (\text{B.45})$$

621

and

$$Q_1 := \frac{1}{2}c_0 \left( (5M + 4 - 2\gamma + (c_0 + \gamma^2)) + (1 + \gamma) \left( \frac{5}{2} + c_0(1 + \gamma) \right) + 2\gamma^2\lambda \right), \quad (\text{B.46})$$

$$Q_2 := \frac{1}{2}c_0 \left[ \left( (1 + \gamma) \left( c_0(1 + \gamma) + \frac{5}{2} \right) + c_0 + 2 + \lambda\gamma^2 + 2(Mc_0 + M + 1) \right) \cdot 2M^2 + \left( 2M^2 + \gamma^2\lambda + \frac{3}{2}\gamma^2(1 + \gamma) \right) \right], \quad (\text{B.47})$$

$$Q_3 := c_0 \left( (1 + \gamma) \left( c_0(1 + \gamma) + \frac{5}{2} \right) + c_0 + 2 + \lambda\gamma^2 + 2(Mc_0 + M + 1) \right) B^2 + c_0 B^2 + \frac{1}{2}\gamma^3\beta^{-1}c_{22} + \gamma^2\beta^{-1}c_{12} + M\gamma\beta^{-1}c_{22}, \quad (\text{B.48})$$

622

where

$$c_0 := 1 + \gamma^2, \quad c_{12} := \frac{d}{2}, \quad c_{22} := \frac{d}{3}, \quad (\text{B.49})$$

623

we have

$$\sup_{j \geq 0} \mathbb{E} \|X_j\|^2 \leq C_x^d := \frac{\left( \frac{\beta M}{2} + \frac{\beta \gamma^2(2-\lambda)}{4} \right) R^2 + \beta BR + \beta A + \frac{3}{4}\beta \|V(0)\|^2 + \frac{4(d+\bar{A})}{\lambda}}{\frac{1}{8}(1-2\lambda)\beta\gamma^2}, \quad (\text{B.50})$$

$$\sup_{j \geq 0} \mathbb{E} \|V_j\|^2 \leq C_v^d := \frac{\left( \frac{\beta M}{2} + \frac{\beta \gamma^2(2-\lambda)}{4} \right) R^2 + \beta BR + \beta A + \frac{3}{4}\beta \|V(0)\|^2 + \frac{4(d+\bar{A})}{\lambda}}{\frac{\beta}{4}(1-2\lambda)}. \quad (\text{B.51})$$

## 624 B.2.4 Proofs of auxiliary results

625 *Proof of Lemma 8.* Note that  $Q_{t_0}(t_1)Z_t^0$  is a  $2d$ -dimensional martingale and by Doob's martingale  
626 inequality, for any  $h > 0$ ,

$$\begin{aligned} \mathbb{P} \left( \sup_{t_0 \leq t \leq t_1} \|Q_{t_0}(t_1)Z_t^0\| \geq h \right) &\leq e^{-\beta\theta h^2/2} \mathbb{E} \left[ e^{(\beta\theta/2)\|Q_{t_0}(t_1)Z_{t_1}^0\|^2} \right] \\ &= e^{-\beta\theta h^2/2} \frac{1}{\sqrt{\det(I - \beta\theta\Sigma_{t_1})}} e^{\frac{\beta\theta}{2}\langle \mu_{t_1}, (I - \beta\theta\Sigma_{t_1})^{-1}\mu_{t_1} \rangle}, \end{aligned} \quad (\text{B.52})$$

627 where the last line above uses the fact that  $Q_{t_0}(t_1)Z_{t_1}$  is a Gaussian random vector with mean

$$\mu_{t_1} = e^{-t_1 H_\gamma} (V(0), Y(0))^T,$$

628 and covariance matrix

$$\begin{aligned} \Sigma_{t_1} &= 2\gamma\beta^{-1} \int_0^{t_1} \left( e^{(s-t_1)H_\gamma} I^{(2)} \right) \left( e^{(s-t_1)H_\gamma} I^{(2)} \right)^T ds \\ &= 2\gamma\beta^{-1} \int_0^{t_1} e^{-sH_\gamma} I^{(2)} e^{-sH_\gamma^T} ds. \end{aligned}$$

629 We next estimate  $\det(I - \beta\theta\Sigma_{t_1})$  from (B.52). Let us recall from Lemma 2 that if  $\gamma = 2\sqrt{m}$ , then  
630 we recall from Lemma 2 that,

$$\|e^{-tH_\gamma}\| \leq \sqrt{C_H + 2 + (m+1)^2 t^2} \cdot e^{-\sqrt{m}t},$$

631 and thus, we have

$$\|\Sigma_{t_1}\| \leq 2\gamma\beta^{-1} \int_0^{t_1} (C_H + 2 + (m+1)^2 t^2) e^{-2\sqrt{m}t} dt \leq \gamma\beta^{-1} \frac{2C_H m + 4m + (m+1)^2}{2m\sqrt{m}}.$$

632 Therefore we infer that the eigenvalues of  $I - \beta\theta\Sigma$  are bounded below by  $1 - \theta \frac{\gamma(2C_H m + 4m + (m+1)^2)}{2m\sqrt{m}}$ .

633 The conclusion then follows from (B.52).  $\square$

634 *Proof of Lemma 9.* By Assumption 1 (iii),  $x \cdot \nabla F(x) \geq m\|x\|^2 - b$ . Thus in order to show the drift  
635 condition (B.38), it suffices to show that

$$m\|x\|^2 - b - 2\lambda(F(x) + \gamma^2\|x\|^2/4) \geq -2\bar{A}/\beta. \quad (\text{B.53})$$

636 Given the definition of  $\lambda$  in (B.36), by Lemma 20, we get

$$\begin{aligned} & m\|x\|^2 - b - 2\lambda(F(x) + \gamma^2\|x\|^2/4) \\ & \geq m\|x\|^2 - b - \frac{m}{M + \frac{1}{2}\gamma^2}(F(x) + \gamma^2\|x\|^2/4) \\ & \geq \frac{mM + \frac{1}{4}m\gamma^2}{M + \frac{1}{2}\gamma^2}\|x\|^2 - b - \frac{m}{M + \frac{1}{2}\gamma^2}\left(\frac{M}{2}\|x\|^2 + B\|x\| + A\right) \\ & = \frac{m}{M + \frac{1}{2}\gamma^2}\left(\frac{1}{2}M\|x\|^2 + \frac{1}{4}\gamma^2\|x\|^2 - B\|x\| - \frac{b}{m}\left(M + \frac{1}{2}\gamma^2\right) - A\right) \\ & \geq \frac{m}{M + \frac{1}{2}\gamma^2}\left(-\frac{B^2}{2M + \gamma^2} - \frac{b}{m}\left(M + \frac{1}{2}\gamma^2\right) - A\right) = -2\bar{A}/\beta, \end{aligned}$$

637 by the definition of  $\bar{A}$  in (B.37). Hence, (B.53) holds and the proof is complete.  $\square$

638 *Proof of Lemma 10.* According to Lemma EC.1 in [GGZ18],

$$\begin{aligned} \sup_{t \geq 0} \mathbb{E}\|X(t)\|^2 & \leq \frac{\int_{\mathbb{R}^{2d}} \mathcal{V}(x, v) d\mu_0(x, v) + \frac{d+\bar{A}}{\lambda}}{\frac{1}{8}(1-2\lambda)\beta\gamma^2}, \\ \sup_{t \geq 0} \mathbb{E}\|V(t)\|^2 & \leq \frac{\int_{\mathbb{R}^{2d}} \mathcal{V}(x, v) d\mu_0(x, v) + \frac{d+\bar{A}}{\lambda}}{\frac{\beta}{4}(1-2\lambda)}, \end{aligned}$$

639 where  $\mathcal{V}$  is the Lyapunov function defined in (B.35) and  $\mu_0$  is the initial distribution of  $(X(0), V(0))$   
640 and in our case,  $\mu_0 = \delta_{(X(0), V(0))}$  and  $\|X(0)\| \leq R$  and  $V(0) \in \mathbb{R}^d$ , and for any  $0 < \eta \leq$   
641  $\min\left\{1, \frac{\gamma}{K_2}(d/\beta + \bar{A}/\beta), \frac{\gamma\lambda}{2K_1}\right\}$  with  $\hat{K}_1$  and  $\hat{K}_2$  given in (B.42) and (B.43),<sup>3</sup> and according to  
642 Lemma EC.5 in [GGZ18], we also have

$$\begin{aligned} \sup_{j \geq 0} \mathbb{E}\|X_j\|^2 & \leq \frac{\int_{\mathbb{R}^{2d}} \mathcal{V}(x, v) \mu_0(dx, dv) + \frac{4(d+\bar{A})}{\lambda}}{\frac{1}{8}(1-2\lambda)\beta\gamma^2}, \\ \sup_{j \geq 0} \mathbb{E}\|V_j\|^2 & \leq \frac{\int_{\mathbb{R}^{2d}} \mathcal{V}(x, v) \mu_0(dx, dv) + \frac{4(d+\bar{A})}{\lambda}}{\frac{\beta}{4}(1-2\lambda)}. \end{aligned}$$

643 We recall from (B.35) that  $\mathcal{V}(x, v) = \beta F(x) + \frac{\beta}{4}\gamma^2(\|x + \gamma^{-1}v\|^2 + \|\gamma^{-1}v\|^2 - \lambda\|x\|^2)$ , and  
644  $\|X(0)\| \leq R$  and  $V(0) \in \mathbb{R}^d$ . By Lemma 20, we get

$$\mathcal{V}(x, v) \leq \frac{\beta M}{2}\|x\|^2 + \beta B\|x\| + \beta A + \frac{\beta}{4}\gamma^2(\|x + \gamma^{-1}v\|^2 + \|\gamma^{-1}v\|^2 - \lambda\|x\|^2),$$

645 so that

$$\begin{aligned} & \mathcal{V}(X(0), V(0)) \\ & = \frac{\beta M}{2}\|X(0)\|^2 + \beta B\|X(0)\| + \beta A + \frac{\beta}{4}\gamma^2(2\|X(0)\|^2 + 3\gamma^{-2}\|V(0)\|^2 - \lambda\|X(0)\|^2) \\ & \leq \left(\frac{\beta M}{2} + \frac{\beta\gamma^2(2-\lambda)}{4}\right)R^2 + \beta BR + \beta A + \frac{3}{4}\beta\|V(0)\|^2. \end{aligned}$$

646 Hence, the conclusion follows.  $\square$

<sup>3</sup>Note that in the definition of  $\hat{K}_1, \hat{K}_2$  in [GGZ18], there is a constant  $\delta$ , which is simply zero, in the context of the current paper.

647 **B.3 Proof of Theorem 4**

648 The proof of Theorem 4 is similar to the proof of Theorem 3. For brevity, we omit some of the details,  
649 and only outline the key steps and the propositions and lemmas used for the proof of Theorem 4.

650 **Proposition 11.** Fix any  $r > 0$  and  $0 < \varepsilon < \min\{\bar{\varepsilon}_1^J, \bar{\varepsilon}_2^J\}$ , where

$$\bar{\varepsilon}_1^J := \frac{m_J(\bar{\varepsilon})}{4C_J(\bar{\varepsilon})(1 + \|J\|)L(1 + \frac{1}{64C_J(\bar{\varepsilon})^2})}, \quad \bar{\varepsilon}_2^J := 8rC_J(\bar{\varepsilon}). \quad (\text{B.54})$$

651 Consider the stopping time:

$$\tau := \inf \left\{ t \geq 0 : \|X(t) - x_*\| \geq \varepsilon + re^{-m_J(\bar{\varepsilon})t} \right\}.$$

652 For any initial point  $X(0) = x$  with  $\|x - x_*\| \leq r$ , and

$$\beta \geq \frac{128C_J(\bar{\varepsilon})^2}{m_J(\bar{\varepsilon})\varepsilon^2} \left( \frac{d}{2} \log(2) + \log \left( \frac{2(1 + \|J\|)M\mathcal{T} + 1}{\delta} \right) \right),$$

653 we have

$$\mathbb{P}_x(\tau \in [\mathcal{T}_{rec}^J, \mathcal{T}_{esc}^J]) \leq \delta.$$

654 **B.3.1 Completing the proof of Theorem 4**

655 We first compare the discrete dynamics (1.10) and the continuous dynamics (1.9). Define:

$$\tilde{X}(t) = X_0 - \int_0^t A_J \left( \nabla F(\tilde{X}(\lfloor s/\eta \rfloor \eta)) \right) ds + \sqrt{2\gamma\beta^{-1}} \int_0^t dB_s. \quad (\text{B.55})$$

656 The process  $\tilde{X}$  defined in (B.55) is the continuous-time interpolation of the iterates  $\{X_k\}$ . In particu-  
657 lar, the joint distribution of  $\{X_k : k = 1, 2, \dots, K\}$  is the same as  $\{\tilde{X}(t) : t = \eta, 2\eta, \dots, K\eta\}$  for  
658 any positive integer  $K$ .

659 By following Lemma 7 in [RRT17] and apply the uniform  $L^2$  bounds for  $X_k$  in Corollary 17 provided  
660 that the stepsize  $\eta$  is sufficiently small (we apply the bound  $\|A_J\| \leq 1 + \|J\|$  to Corollary 17)

$$\eta \leq \bar{\eta}_4^J := \frac{1}{M(1 + \|J\|)^2}, \quad (\text{B.56})$$

661 we will obtain an upper bound on the relative entropy  $D(\cdot|\cdot)$  between the law  $\tilde{\mathbb{P}}^{K\eta}$  of  $(\tilde{X}(t) : t \leq K\eta)$   
662 and the law  $\mathbb{P}^{K\eta}$  of  $(X(t) : t \leq K\eta)$ , and by Pinsker's inequality an upper bound on the total variation  
663  $\|\cdot\|_{TV}$  as well. More precisely, we have

$$\left\| \tilde{\mathbb{P}}^{K\eta} - \mathbb{P}^{K\eta} \right\|_{TV}^2 \leq \frac{1}{2} D \left( \tilde{\mathbb{P}}^{K\eta} \middle| \middle| \mathbb{P}^{K\eta} \right) \leq \frac{1}{2} C_1 K \eta^2, \quad (\text{B.57})$$

664 where (we use the bound  $\|A_J\| \leq 1 + \|J\|$ )

$$C_1 := 6(\beta((1 + \|J\|)^2 M^2 C_d + B^2) + d)(1 + \|J\|)^2 M^2, \quad (\text{B.58})$$

665 where  $C_d$  is defined in (B.72).

666 Let us now complete the proof of Theorem 4. We need to show that

$$\mathbb{P}((X_1, \dots, X_K) \in \mathcal{A}) \leq \delta,$$

667 where  $K = \lfloor \eta^{-1} \mathcal{T}_{esc}^J \rfloor$  and  $\mathcal{A} := \mathcal{A}_1 \cap \mathcal{A}_2$ :

$$\mathcal{A}_1 := \left\{ (x_1, \dots, x_K) \in (\mathbb{R}^d)^K : \max_{k \leq \eta^{-1} \mathcal{T}_{rec}^J} \frac{\|x_k - x_*\|}{\varepsilon + re^{-m_J(\bar{\varepsilon})k\eta}} \leq \frac{1}{2} \right\},$$

$$\mathcal{A}_2 := \left\{ (x_1, \dots, x_K) \in (\mathbb{R}^d)^K : \max_{\eta^{-1} \mathcal{T}_{rec}^J \leq k \leq K} \frac{\|x_k - x_*\|}{\varepsilon + re^{-m_J(\bar{\varepsilon})k\eta}} \geq 1 \right\}.$$

668 Similar to the proof in Section B.2.1 and by (B.57), we get

$$\mathbb{P}((X_1, \dots, X_K) \in \mathcal{A}) \leq \mathbb{P}((X(\eta), \dots, X(K\eta)) \in \mathcal{A}) + \frac{\delta}{3}, \quad (\text{B.59})$$

669 provided that

$$\eta \leq \bar{\eta}_3^J := \frac{2\delta^2}{9C_1\mathcal{T}_{\text{esc}}^J}. \quad (\text{B.60})$$

670 It remains to estimate the probability of  $\mathbb{P}((X(\eta), \dots, X(K\eta)) \in \mathcal{A}_1 \cap \mathcal{A}_2)$  for the non-reversible  
 671 Langevin diffusion. Partition the interval  $[0, \mathcal{T}_{\text{rec}}^J]$  using the points  $0 = t_1 < t_1 < \dots < t_{\lceil \eta^{-1}\mathcal{T}_{\text{rec}}^J \rceil} =$   
 672  $\mathcal{T}_{\text{rec}}^J$  with  $t_k = k\eta$  for  $k = 0, 1, \dots, \lceil \eta^{-1}\mathcal{T}_{\text{rec}}^J \rceil - 1$ , and consider the event:

$$\mathcal{B} := \left\{ \max_{0 \leq k \leq \lceil \eta^{-1}\mathcal{T}_{\text{rec}}^J \rceil - 1} \max_{t \in [t_k, t_{k+1}]} \|X(t) - X(t_{k+1})\| \leq \frac{\varepsilon}{2} \right\}.$$

673 Similar to the proof in Section B.2.1, we get

$$\mathbb{P}((X(\eta), \dots, X(K\eta)) \in \mathcal{A}) \leq \frac{\delta}{3} + \mathbb{P}(\mathcal{B}^c), \quad (\text{B.61})$$

674 provided that (by applying Proposition 11):

$$\beta \geq \underline{\beta}_1^J := \frac{128C_J(\bar{\varepsilon})^2}{m_J(\bar{\varepsilon})\varepsilon^2} \left( \frac{d}{2} \log(2) + \log \left( \frac{6(1 + \|J\|)M\mathcal{T} + 3}{\delta} \right) \right). \quad (\text{B.62})$$

675 To complete the proof, we need to show that  $\mathbb{P}(\mathcal{B}^c) \leq \frac{\delta}{3}$  in view of (B.59) and (B.61). For any  
 676  $t \in [t_k, t_{k+1}]$ , where  $t_{k+1} - t_k = \eta$ , we have

$$\begin{aligned} & \|X(t) - X(t_{k+1})\| \\ & \leq \int_t^{t_{k+1}} \|A_J \nabla F(X(s))\| ds + \sqrt{2\beta^{-1}} \|B_t - B_{t_{k+1}}\| \\ & \leq \|A_J\| M \int_t^{t_{k+1}} \|X(s) - X(t_{k+1})\| ds + \eta \|A_J \nabla F(X(t_{k+1}))\| + \sqrt{2\beta^{-1}} \|B_t - B_{t_{k+1}}\| \\ & \leq \|A_J\| M \int_t^{t_{k+1}} \|X(s) - X(t_{k+1})\| ds \\ & \quad + \eta \|A_J\| \cdot (M \|X(t_{k+1})\| + B) + \sqrt{2\beta^{-1}} \|B_t - B_{t_{k+1}}\|. \end{aligned}$$

677 By Gronwall's inequality, we get the key estimate:

$$\begin{aligned} & \sup_{t \in [t_k, t_{k+1}]} \|X(t) - X(t_{k+1})\| \\ & \leq e^{\eta \|A_J\| M} \left[ \eta \|A_J\| \cdot (M \|X(t_{k+1})\| + B) + \sqrt{2\beta^{-1}} \sup_{t \in [t_k, t_{k+1}]} \|B_t - B_{t_{k+1}}\| \right]. \end{aligned}$$

678 Then, by following the same argument as in Section B.2.1 and also apply  $\|A_J\| \leq 1 + \|J\|$ , we can  
 679 show that  $\mathbb{P}(\mathcal{B}^c) \leq \frac{\delta}{3}$  provided that  $\eta \leq 1$  and

$$\eta \leq \bar{\eta}_1^J := \frac{\varepsilon e^{-(1+\|J\|)M}}{8(1 + \|J\|)B}, \quad (\text{B.63})$$

680 and

$$\eta \leq \bar{\eta}_2^J := \frac{\delta \varepsilon^2 e^{-2(1+\|J\|)M}}{384(1 + \|J\|)^2 M^2 C_c \mathcal{T}_{\text{rec}}^J}, \quad (\text{B.64})$$

681 where  $C_c$  is defined in (B.71) and

$$\beta \geq \underline{\beta}_2^J := \frac{512d\eta \log(2^{1/4} e^{1/4} 6\delta^{-1} \mathcal{T}_{\text{rec}}^J / \eta)}{\varepsilon^2 e^{-2(1+\|J\|)M} \eta}. \quad (\text{B.65})$$

682 To complete the proof, we need work on the leading orders of the constants. We treat  $\|J\|$ ,  $M$ ,  $L$  as  
 683 constant. The argument is similar to the argument in the proof of Theorem 3 and is thus omitted here.  
 684 The proof is now complete.



685 **B.3.2 Proof of Proposition 11**

686 Before we proceed to the proof of Proposition 11, let us first state the following two lemmas that will  
687 be used in the proof of Proposition 11.

688 **Lemma 12.** For any  $\theta \in (0, \frac{\lambda_1^J - \tilde{\varepsilon}}{(C_J(\tilde{\varepsilon}))^2})$ ,  $h > 0$  and  $y_0 \in \mathbb{R}^d$ ,

$$\mathbb{P} \left( \sup_{t_0 \leq t \leq t_1} \|Q_{t_0}(t_1)Z_t^0\| \geq h \right) \leq \left( 1 - \theta \frac{(C_J(\tilde{\varepsilon}))^2}{\lambda_1^J - \tilde{\varepsilon}} \right)^{-d/2} e^{-\frac{\beta\theta}{2}[h^2 - \langle \mu_{t_1}, (I - \beta\theta\Sigma_{t_1})^{-1}\mu_{t_1} \rangle]},$$

689 where  $Q_{t_0}(t_1)$  is defined in (B.67),  $Z_t^0$  is defined in (B.68), and

$$\mu_t := e^{-tA_J H} y_0, \quad \Sigma_t := 2\beta^{-1} \int_0^t e^{-s(A_J H)} e^{-s(A_J H)^T} ds. \quad (\text{B.66})$$

690 **Lemma 13.** Given  $t_0 \leq t \leq (t_1 \wedge \tau)$ , where  $\tau$  is the stopping time defined in Proposition 11, we  
691 have

$$\|Q_{t_0}(t_1)Z_t^1\| \leq \frac{C_J(\tilde{\varepsilon})\|A_J\|L}{2} \int_0^t e^{(s-t_1)m_J(\tilde{\varepsilon})} \left( \varepsilon + r e^{-m_J(\tilde{\varepsilon})s} \right)^2 ds,$$

692 where  $Q_{t_0}(t_1)$  is defined in (B.67), and  $Z_t^1$  is defined in (B.69).

693 *Proof of Proposition 11.* We recall  $x_*$  is a local minimum of  $F$  and  $H$  is the Hessian matrix:  $H =$   
694  $\nabla^2 F(x_*)$ , and we write

$$X(t) = Y(t) + x_*.$$

695 Thus, we have the decomposition

$$\nabla F(X(t)) = HY(t) - \rho(Y(t)),$$

696 where  $\|\rho(Y(t))\| \leq \frac{1}{2}L\|Y(t)\|^2$  since the Hessian of  $F$  is  $L$ -Lipschitz (Lemma 1.2.4. [Nes13]). This  
697 implies that

$$dY(t) = -A_J H Y(t) dt + A_J \rho(Y(t)) dt + \sqrt{2\beta^{-1}} dB_t.$$

698 Thus, we get

$$Y(t) = e^{-tA_J H} Y(0) + \sqrt{2\beta^{-1}} \int_0^t e^{(s-t)A_J H} dB_s + \int_0^t e^{(s-t)A_J H} A_J \rho(Y(s)) ds.$$

699 Given  $0 \leq t_0 \leq t_1$ , we define the matrix flow

$$Q_{t_0}(t) := e^{(t_0-t)A_J H}, \quad (\text{B.67})$$

700 and  $Z_t := e^{(t-t_0)A_J H} Y_t$  so that

$$Z_t = e^{-t_0 A_J H} Y(0) + \sqrt{2\beta^{-1}} \int_0^t e^{(s-t_0)A_J H} dB_s + \int_0^t e^{(s-t_0)A_J H} A_J \rho(Y(s)) ds.$$

701 We define the decomposition  $Z_t = Z_t^0 + Z_t^1$ , where

$$Z_t^0 = e^{-t_0 A_J H} Y(0) + \sqrt{2\beta^{-1}} \int_0^t e^{(s-t_0)A_J H} dB_s, \quad (\text{B.68})$$

$$Z_t^1 = \int_0^t e^{(s-t_0)A_J H} A_J \rho(Y(s)) ds. \quad (\text{B.69})$$

702 It follows that for any  $t_0 \leq t \leq t_1$ ,

$$Q_{t_0}(t_1)Z_t^1 = \int_0^t e^{(s-t_1)A_J H} A_J \rho(Y(s)) ds,$$

$$Q_{t_0}(t_1)Z_t^0 = e^{-t_1 A_J H} Y(0) + \sqrt{2\beta^{-1}} \int_0^t e^{(s-t_1)A_J H} dB_s.$$

703 The rest of the proof is similar to the proof of Proposition 7. We apply Lemma 13 to bound the term  
704  $Q_{t_0}(t_1)Z_t^1$  and apply Lemma 12 to bound the term  $Q_{t_0}(t_1)Z_t^0$ . By letting  $\gamma = 1$  in Proposition 7 and  
705 replacing  $d$  by  $d/2$  due to Lemma 12, and  $\|H_\gamma\|$  by  $\|A_J H\|$  and using the bounds  $\|A_J\| \leq (1 + \|J\|)$   
706 and  $\|A_J H\| \leq (1 + \|J\|)M$ , we obtain the desired result in Proposition 11.  $\square$

707 **B.3.3 Uniform  $L^2$  bounds for NLD**

708 In this section we establish uniform  $L^2$  bounds for both the continuous time dynamics (1.9) and  
709 discrete time dynamics (1.10). The main idea of the proof is to use Lyapunov functions. Our local  
710 analysis result relies on the approximation of the continuous time dynamics (1.9) by the discrete time  
711 dynamics (1.10). The uniform  $L^2$  bound for the discrete dynamics (1.10) is used to derive the relative  
712 entropy to compare the laws of the continuous time dynamics and the discrete time dynamics, and  
713 the uniform  $L^2$  bound for the continuous dynamics (1.9) is used to control the tail of the continuous  
714 dynamics in Section B.3.1. We first recall the continuous-time dynamics from (1.9):

$$dX(t) = -A_J(\nabla F(X(t)))dt + \sqrt{2\beta^{-1}}dB_t, \quad A_J = I + J,$$

715 where  $J$  is a  $d \times d$  anti-symmetric matrix, i.e.  $J^T = -J$ . The generator of this continuous time  
716 process is given by

$$\mathcal{L} = -A_J \nabla F \cdot \nabla + \beta^{-1} \Delta \tag{B.70}$$

717 **Lemma 14.** *Given  $X(0) = x \in \mathbb{R}^d$ ,*

$$\mathbb{E}[F(X(t))] \leq F(x) + \frac{B}{2} + A + \frac{b(M+B)}{m} + \frac{2M\beta^{-1}d(M+B)}{m^2}.$$

718 Since  $F$  has at most the quadratic growth (due to Lemma 20), we immediately have the following  
719 corollary.

720 **Corollary 15.** *Given  $\|X(0)\| \leq R = \sqrt{b/m}$ ,*

$$\mathbb{E}[\|X(t)\|^2] \leq C_c := \frac{MR^2 + 2BR + B + 4A}{m} + \frac{2b(M+B)}{m^2} + \frac{4M\beta^{-1}d(M+B)}{m^3} + \frac{b}{m} \log 3. \tag{B.71}$$

721 We next show uniform  $L^2$  bounds for the discrete iterates  $X_k$ , where we recall from (1.10) that the  
722 non-reversible Langevin dynamics is given by:

$$X_{k+1} = X_k - \eta A_J(\nabla F(X_k)) + \sqrt{2\eta\beta^{-1}}\xi_k.$$

723 **Lemma 16.** *Given that  $\eta \leq \frac{1}{M\|A_J\|^2}$ , we have*

$$\mathbb{E}_x[F(X_k)] \leq F(x) + \frac{B}{2} + A + \frac{4(M+B)M\beta^{-1}d}{m^2} + \frac{(M+B)b}{m}.$$

724 Since  $F$  has at most the quadratic growth (due to Lemma 20), we immediately have the following  
725 corollary.

726 **Corollary 17.** *Given that  $\eta \leq \frac{1}{M\|A_J\|^2}$  and  $\|X(0)\| \leq R = \sqrt{b/m}$ , we have*

$$\mathbb{E}[\|X_k\|^2] \leq C_d := \frac{MR^2 + 2BR + B + 4A}{m} + \frac{8(M+B)M\beta^{-1}d}{m^3} + \frac{2(M+B)b}{m^2} + \frac{b}{m} \log 3. \tag{B.72}$$

727 **B.3.4 Proofs of auxiliary results**

728 *Proof of Lemma 12.* By following the proof of Lemma 8. We get

$$\mathbb{P}\left(\sup_{t_0 \leq t \leq t_1} \|Q_{t_0}(t_1)Z_t^0\| \geq h\right) \leq \frac{1}{\sqrt{\det(I - \beta\theta\Sigma_{t_1})}} e^{-\frac{\beta\theta}{2}[h^2 - \langle \mu_{t_1}, (I - \beta\theta\Sigma_{t_1})^{-1}\mu_{t_1} \rangle]},$$

729 Recall from (2.3) that for any  $\tilde{\varepsilon} > 0$ , there exists some  $C_J(\tilde{\varepsilon})$  such that for every  $t \geq 0$ ,

$$\|e^{-tA_J H}\| \leq C_J(\tilde{\varepsilon})e^{-(\lambda_1^J - \tilde{\varepsilon})t},$$

730 Hence, by the definition of  $\Sigma_t$  from (B.66), we get

$$\|\Sigma_t\| \leq 2\beta^{-1} \int_0^\infty (C_J(\tilde{\varepsilon}))^2 e^{-2(\lambda_1^J - \tilde{\varepsilon})t} dt = \frac{\beta^{-1}(C_J(\tilde{\varepsilon}))^2}{\lambda_1^J - \tilde{\varepsilon}}.$$

731 The rest of the proof follows similarly as in the proof of Lemma 8. □

732 *Proof of Lemma 13.* Note that

$$\|Q_{t_0}(t_1)Z_t^1\| \leq \int_0^t \left\| e^{(s-t_1)A_J H} \right\| \|A_J\| \|\rho(Y(s))\| ds,$$

733 and by applying  $\|\rho(Y(t))\| \leq \frac{1}{2}L\|Y(t)\|^2$  and (2.3), and  $t_0 \leq t \leq (t_1 \wedge \tau)$  and the definition of the  
734 stopping time  $\tau$  in Proposition 11, we get the desired result.  $\square$

735 *Proof of Lemma 14.* Note that if we can show that  $F(x)$  is a Lyapunov function for  $X(t)$ :

$$\mathcal{L}F(x) \leq -\epsilon_1 F(x) + b_1, \quad (\text{B.73})$$

736 for some  $\epsilon_1, b_1 > 0$ , then

$$\mathbb{E}[F(X(t))] \leq F(x) + \frac{b_1}{\epsilon_1}.$$

737 Let us first prove this. Applying Ito formula to  $e^{\epsilon_1 t} F(X(t))$ , we obtain from Dynkin formula and  
738 the drift condition (B.73) that for  $t_K := \min\{t, \tau_K\}$  with  $\tau_K$  be the exit time of  $X(t)$  from a ball  
739 centered at 0 with radius  $K$  with  $X(0) = x$ ,

$$\mathbb{E}[e^{\epsilon_1 t_K} F(X(t_K))] \leq F(x) + \mathbb{E} \left[ \int_0^{t_K} b_1 e^{\epsilon_1 s} ds \right] \leq F(x) + \int_0^t b_1 e^{\epsilon_1 s} ds \leq F(x) + \frac{b_1}{\epsilon_1} \cdot e^{\epsilon_1 t}.$$

740 Let  $K \rightarrow \infty$ , then we can infer from Fatou's lemma that for any  $t$ :

$$\mathbb{E} [e^{\epsilon_1 t} F(X(t))] \leq F(x) + \frac{b_1}{\epsilon_1} \cdot e^{\epsilon_1 t}.$$

741 Hence, we have

$$\mathbb{E}[F(X(t))] \leq F(x) + \frac{b_1}{\epsilon_1}.$$

742 Next, let us prove (B.73). By the definition of  $\mathcal{L}$  in (B.70), we can compute that

$$\begin{aligned} \mathcal{L}F(x) &= -A_J \nabla F(x) \cdot \nabla F(x) + \beta^{-1} \Delta F(x) \\ &= -\|\nabla F(x)\|^2 + \beta^{-1} \Delta F(x), \end{aligned}$$

743 since  $J$  is anti-symmetric so that  $\langle \nabla F(x), J \nabla F(x) \rangle = 0$ . Moreover,

$$\|x\| \cdot \|\nabla F(x)\| \geq \langle x, \nabla F(x) \rangle \geq m\|x\|^2 - b, \quad (\text{B.74})$$

744 implies that

$$\|\nabla F(x)\| \geq m\|x\| - \frac{b}{\|x\|} \geq \frac{1}{2}m\|x\|, \quad (\text{B.75})$$

745 provided that  $\|x\| \geq \sqrt{2b/m}$ , and thus

$$\mathcal{L}F(x) \leq -\frac{m^2}{4}\|x\|^2 + \beta^{-1} \Delta F(x) \leq -\frac{m^2}{4}\|x\|^2 + \frac{mb}{2} + \beta^{-1} \Delta F(x), \quad (\text{B.76})$$

746 for any  $\|x\| \geq \sqrt{2b/m}$ . On the other hand, for any  $\|x\| \leq \sqrt{2b/m}$ , we have

$$\mathcal{L}F(x) \leq \beta^{-1} \Delta F(x) \leq -\frac{m^2}{4}\|x\|^2 + \frac{mb}{2} + \beta^{-1} \Delta F(x). \quad (\text{B.77})$$

747 Hence, for any  $x \in \mathbb{R}^d$ ,

$$\mathcal{L}F(x) \leq -\frac{m^2}{4}\|x\|^2 + \frac{mb}{2} + \beta^{-1} \Delta F(x). \quad (\text{B.78})$$

748 Next, recall that  $F$  is  $M$ -smooth, and thus

$$\Delta F(x) \leq Md.$$

749 Finally, by Lemma 20,

$$F(x) \leq \frac{M}{2}\|x\|^2 + B\|x\| + A \leq \frac{M+B}{2}\|x\|^2 + \frac{B}{2} + A.$$

750 Therefore, we have

$$\mathcal{L}F(x) \leq -\frac{m^2}{2(M+B)}F(x) + \frac{m^2(\frac{B}{2} + A)}{2(M+B)} + \frac{mb}{2} + M\beta^{-1}d.$$

751 Hence, the proof is complete.  $\square$

752 *Proof of Corollary 15.* Recall from Lemma 20 that

$$F(x) \geq \frac{m}{2} \|x\|^2 - \frac{b}{2} \log 3,$$

753 which implies that

$$\|x\|^2 \leq \frac{2}{m} F(x) + \frac{b}{m} \log 3.$$

754 It then follows from Lemma 14 that

$$\mathbb{E}[\|X(t)\|^2] \leq \frac{2}{m} F(x) + \frac{B}{m} + \frac{2A}{m} + \frac{2b(M+B)}{m^2} + \frac{4M\beta^{-1}d(M+B)}{m^3} + \frac{b}{m} \log 3.$$

755 Recall that  $\|X(0)\| = \|x\| \leq R$  and by Lemma 20 we get  $F(x) \leq \frac{M}{2} \|x\|^2 + B\|x\| + A$ , and thus

$$\mathbb{E}[\|X(t)\|^2] \leq C_c = \frac{MR^2 + 2BR + B + 4A}{m} + \frac{2b(M+B)}{m^2} + \frac{4M\beta^{-1}d(M+B)}{m^3} + \frac{b}{m} \log 3.$$

756 □

757 *Proof of Lemma 16.* Suppose we have

$$\frac{\mathbb{E}_x[F(X_1)] - F(x)}{\eta} \leq -\epsilon_2 F(x) + b_2, \quad (\text{B.79})$$

758 uniformly for small  $\eta$ , where  $\epsilon_2, b_2$  are positive constants that are independent of  $\eta$ , then we will first  
759 show below that

$$\mathbb{E}_x[F(X_k)] \leq F(x) + \frac{b_2}{\epsilon_2}.$$

760 We will use the discrete Dynkin's formula (see, e.g. Section 4.2 in [MT92]). Let  $\mathbb{F}_i$  denote the  
761 filtration generated by  $X_0, \dots, X_i$ . Note  $\{X_k : k \geq 0\}$  is a time-homogeneous Markov process, so  
762 the drift condition (B.79) implies that

$$\mathbb{E}[F(X_i)|\mathbb{F}_{i-1}] \leq (1 - \eta\epsilon_2)F(X_{i-1}) + b_2.$$

763 Then by letting  $r = 1/(1 - \eta\epsilon_2)$ , we obtain

$$\mathbb{E}[rF(X_i)|\mathbb{F}_{i-1}] \leq F(X_{i-1}) + rb_2.$$

764 Then we can compute that

$$\mathbb{E}[r^i F(X_i)|\mathbb{F}_{i-1}] - r^{i-1} F(X_{i-1}) = r^{i-1} \cdot [\mathbb{E}[rF(X_i)|\mathbb{F}_{i-1}] - F(X_{i-1})] \leq r^i b_2. \quad (\text{B.80})$$

765 Define the stopping time  $\tau_{k,K} = \min\{k, \inf\{i : |X_i| \geq K\}\}$ , where  $K$  is a positive integer, so that  
766  $X_i$  is essentially bounded for  $i \leq \tau_{k,K}$ . Applying the discrete Dynkin's formula (see, e.g. Section  
767 4.2 in [MT92]), we have

$$\mathbb{E}_x[r^{\tau_{k,K}} F(X_{\tau_{k,K}})] = \mathbb{E}_x[F(X_0)] + \mathbb{E}\left[\sum_{i=1}^{\tau_{k,K}} (\mathbb{E}[r^i F(X_i)|\mathbb{F}_{i-1}] - r^{i-1} F(X_{i-1}))\right].$$

768 Then it follows from (B.80) that

$$\mathbb{E}_x[r^{\tau_{k,K}} F(X_{\tau_{k,K}})] \leq F(x) + b_2\eta \sum_{i=1}^k r^i.$$

769 As  $\tau_{k,K} \rightarrow k$  almost surely as  $K \rightarrow \infty$ , we infer from Fatou's Lemma that

$$\mathbb{E}_x[r^k F(X_k)] \leq F(x) + b_2\eta \sum_{i=1}^k r^i,$$

770 which implies that for all  $k$ ,

$$\mathbb{E}_x[F(X_k)] \leq F(x) + \frac{b_2\eta}{r-1} = F(x) + \frac{b_2(1-\eta_2\epsilon_2)}{\epsilon_2} \leq F(x) + \frac{b_2}{\epsilon_2},$$

771 as  $r = 1/(1 - \eta_2 \epsilon_2)$ . Hence we have

$$\mathbb{E}_x [F(X_k)] \leq F(x) + \frac{b_2}{\epsilon_2}.$$

772 It remains to prove (B.79). Note that as  $\nabla F$  is Lipschitz continuous with constant  $M$  so that:

$$F(y) \leq F(x) + \nabla F(x)(y - x) + \frac{M}{2} \|y - x\|^2.$$

773 Therefore,

$$\begin{aligned} \frac{\mathbb{E}_x[F(X_1)] - F(x)}{\eta} &= \frac{1}{\eta} \left( \mathbb{E}_x \left[ F(x - \eta A_J(\nabla F(x)) + \sqrt{2\eta\beta^{-1}}\xi_0) \right] - F(x) \right) \\ &\leq -\nabla F(x) A_J \nabla F(x) + \frac{M}{2\eta} \mathbb{E}_x \left[ \left\| -\eta A_J(\nabla F(x)) + \sqrt{2\eta\beta^{-1}}\xi_0 \right\|^2 \right] \\ &= -\|\nabla F(x)\|^2 + \frac{M}{2} \eta \|A_J \nabla F(x)\|^2 + M\beta^{-1}d \\ &\leq -\frac{1}{2} \|\nabla F(x)\|^2 + M\beta^{-1}d, \end{aligned}$$

774 provided that  $\frac{M}{2} \|A_J\|^2 \eta \leq \frac{1}{2}$ . Similar to the arguments in (B.74)-(B.78), we get

$$\frac{\mathbb{E}_x[F(X_1)] - F(x)}{\eta} \leq -\frac{m^2}{8} \|x\|^2 + M\beta^{-1}d + \frac{mb}{4}.$$

775 Finally, by Lemma 20,

$$F(x) \leq \frac{M}{2} \|x\|^2 + B\|x\| + A \leq \frac{M+B}{2} \|x\|^2 + \frac{B}{2} + A.$$

776 Therefore, we have

$$\frac{\mathbb{E}_x[F(X_1)] - F(x)}{\eta} \leq -\frac{m^2}{4(M+B)} F(x) + \frac{m^2(\frac{B}{2} + A)}{4(M+B)} + M\beta^{-1}d + \frac{mb}{4}.$$

777 Hence, the proof is complete.  $\square$

778 *Proof of Corollary 17.* The proof is similar to the proof of Corollary 15 and is thus omitted.  $\square$

## 779 C Proof of Proposition 5 and Proposition 6

780 *Proof of Proposition 5.* Write  $u$  as the corresponding eigenvector of  $A_J \mathbb{L}^\sigma$  for the eigenvalue  $-\mu_j^* <$   
781  $0$ , so we have

$$A_J \mathbb{L}^\sigma u = -\mu_j^* u. \quad (\text{C.1})$$

782 Then it follows that

$$(-\mu_j^*) u^* \mathbb{L}^\sigma u = u^* \mathbb{L}^\sigma (-\mu_j^* u) = u^* \mathbb{L}^\sigma A_J \mathbb{L}^\sigma u = u^* (\mathbb{L}^\sigma)^T A_J \mathbb{L}^\sigma u = |\mathbb{L}^\sigma u|^2 + u^* (\mathbb{L}^\sigma)^T J \mathbb{L}^\sigma u,$$

783 where  $u^*$  denotes the conjugate transpose of  $u$ ,  $(\mathbb{L}^\sigma)^T$  denotes the transpose of  $\mathbb{L}^\sigma$ , and  $(\mathbb{L}^\sigma)^T = \mathbb{L}^\sigma$   
784 as  $\mathbb{L}^\sigma$  is a real symmetric matrix. It is easy to see that  $u^* \mathbb{L}^\sigma u$  is a real number as  $(u^* \mathbb{L}^\sigma u)^* = u^* \mathbb{L}^\sigma u$ .  
785 In addition,  $u^* (\mathbb{L}^\sigma)^T J \mathbb{L}^\sigma u$  is pure imaginary, since  $(u^* (\mathbb{L}^\sigma)^T J \mathbb{L}^\sigma u)^* = u^* (\mathbb{L}^\sigma)^T J^T \mathbb{L}^\sigma u =$   
786  $-u^* (\mathbb{L}^\sigma)^T J \mathbb{L}^\sigma u$  by the fact that  $J$  is an anti-symmetric real matrix. Hence, we deduce that

$$u^* (\mathbb{L}^\sigma)^T J \mathbb{L}^\sigma u = 0,$$

787 and it implies that

$$(-\mu_j^*) u^* \mathbb{L}^\sigma u = |\mathbb{L}^\sigma u|^2. \quad (\text{C.2})$$

788 Note  $u^* \mathbb{L}^\sigma u \neq 0$  as otherwise  $0$  becomes an eigenvalue of  $\mathbb{L}^\sigma$  from (C.2), which is a contradiction.  
789 In fact, we obtain from (C.2) that  $-u^* \mathbb{L}^\sigma u > 0$  as  $\mu_j^* > 0$  and  $|\mathbb{L}^\sigma u|^2 > 0$ .

790 Since  $\mathbb{L}^\sigma$  is a real symmetric matrix, we have

$$\mathbb{L}^\sigma = S^T D S, \quad (\text{C.3})$$

791 for a real orthogonal matrix  $S$ , where  $D = \text{diag}(\mu_1, \mu_2, \dots, \mu_d)$  with  $\mu_1 < 0 < \mu_2 < \dots < \mu_d$   
 792 being the eigenvalues of  $\mathbb{L}^\sigma$ . Then we obtain

$$\mu_j^* = \frac{|\mathbb{L}^\sigma u|^2}{-u^* \mathbb{L}^\sigma u} = \frac{u^* S^* D^2 S u}{-u^* S^* D S u} = \frac{\sum_{i=1}^d \mu_i^2 |(Su)_i|^2}{\sum_{i=1}^d -\mu_i |(Su)_i|^2}, \quad (\text{C.4})$$

793 where  $(Su)_i$  denotes the  $i$ -th component of the vector  $Su$ . Since  $\mu_1 < 0 < \mu_2 < \dots < \mu_d$ , we  
 794 then have  $(Su)_1 \neq 0$  as otherwise  $-u^* \mathbb{L}^\sigma u = \sum_{i=1}^d -\mu_i |(Su)_i|^2 \leq 0$ , which is a contradiction.  
 795 Therefore, we conclude from (C.4) that

$$\mu_j^* \geq |\mu_1| = \mu^*(\sigma). \quad (\text{C.5})$$

796 The equality  $\mu_j^* = |\mu_1| = \mu^*(\sigma)$  is attained if and only if  $(Su)_i = 0$  for  $i = 2, \dots, n$ . Or equivalently  
 797 if and only if the vector  $Su = ae_1$  where  $a$  is a non-zero constant and  $e_1 = [1 \ 0 \ \dots \ 0]^T$  is the first  
 798 basis vector. Since  $S^{-1} = S^T$ , this is also equivalent to  $u = av$  where  $v = S^T e_1$  is an eigenvector of  
 799  $\mathbb{L}^\sigma$  corresponding to the eigenvalue  $\mu_1$ . Since  $u$  and  $v$  are related up to a constant, this is the same as  
 800 saying  $v$  is an eigenvector of  $A_J \mathbb{L}^\sigma$  satisfying (C.1). Since  $v$  is also an eigenvalue of  $\mathbb{L}^\sigma$  and  $J$  being  
 801 anti-symmetric, has only purely imaginary eigenvalues except a zero eigenvalue, this is if and only if  
 802  $Jv = 0$ . In other words, the equality  $\mu_j^* = |\mu_1| = \mu^*(\sigma)$  is attained if and only if the eigenvector of  
 803  $\mathbb{L}^\sigma$  corresponding to the negative eigenvalue  $\mu_1$  is an eigenvector of  $J$  for the eigenvalue 0.

804 We note finally that Equation (3.5) then readily follows from (3.4) and (C.5).  $\square$

805 *Proof of Proposition 6.* Write  $\tau_{a_1 \rightarrow a_2}^{\beta, n}$  for the first time that the continuous-time dynamics  $\{X(t)\}$   
 806 starting from  $a_1$  to exit the region  $D_n$ . Then by monotone convergence theorem, we have

$$\lim_{R \rightarrow \infty} \mathbb{E} [\tau_{a_1 \rightarrow a_2}^{\beta, n}] = \mathbb{E} [\tau_{a_1 \rightarrow a_2}^\beta].$$

807 Hence, for fixed  $\epsilon > 0$ , one can choose a sufficiently large  $n$  such that

$$|\mathbb{E} [\tau_{a_1 \rightarrow a_2}^{\beta, n}] - \mathbb{E} [\tau_{a_1 \rightarrow a_2}^\beta]| < \epsilon. \quad (\text{C.6})$$

808 We next control the expected difference between the exit times  $\hat{\tau}_{a_1 \rightarrow a_2}^{\beta, n}$  of the discrete dynamics, and  
 809  $\tau_{a_1 \rightarrow a_2}^{\beta, n}$  of the continuous dynamics, from the bounded domain  $D_n$ . For fixed  $\epsilon$  and large  $n$ , we can  
 810 infer from Theorem 4.2 in [GM05] that<sup>4</sup>, for sufficiently small stepsize  $\eta \leq \bar{\eta}(\epsilon, n, \beta)$ ,

$$|\mathbb{E} [\hat{\tau}_{a_1 \rightarrow a_2}^{\beta, n}] - \mathbb{E} [\tau_{a_1 \rightarrow a_2}^{\beta, n}]| < \epsilon. \quad (\text{C.7})$$

811 Together with (C.6), we obtain for  $\eta$  sufficiently small,

$$|\mathbb{E} [\hat{\tau}_{a_1 \rightarrow a_2}^{\beta, n}] - \mathbb{E} [\tau_{a_1 \rightarrow a_2}^\beta]| < 2\epsilon.$$

812 The proof is therefore complete.  $\square$

## 813 D Supporting technical lemmas

**Lemma 18.** Consider the square matrix  $H_\gamma$  defined by (2.2). We have

$$\|H_\gamma\| \leq \sqrt{\gamma^2 + M^2 + 1}.$$

814 *Proof.* It follows from (B.1) that

$$\|H_\gamma\| = \|T_\gamma\| = \max_i \|T_i(\gamma)\|. \quad (\text{D.1})$$

815 We also compute

$$\|T_i(\gamma)\|^2 = \lambda_{\max}(T_i(\gamma)T_i(\gamma)^T) = \lambda_{\max}\left(\begin{bmatrix} \gamma^2 + \lambda_i^2 & -\gamma \\ -\gamma & 1 \end{bmatrix}\right),$$

<sup>4</sup>The Assumption (H2') in Theorem 4.2 of [GM05] can be readily verified in our setting: for both reversible and non-reversible SDE, the drift and diffusion coefficients are clearly Lipschitz; the diffusion matrix is uniformly elliptic; and the domain  $D_n$  is bounded and it satisfies the exterior cone condition.

816 where  $\lambda_{\max}$  denotes the largest real part of the eigenvalues. This leads to

$$\|T_i(\gamma)\|^2 = \frac{\gamma^2 + \lambda_i^2 + 1 + \sqrt{(\gamma^2 + \lambda_i^2 + 1)^2 - 4\lambda_i^2}}{2} \leq \gamma^2 + \lambda_i^2 + 1.$$

817 Since  $m \leq \lambda_i \leq M$  for every  $i$ , we obtain

$$\max_i \|T_i(\gamma)\|^2 \leq \max_i (\gamma^2 + \lambda_i^2 + 1) = \gamma^2 + M^2 + 1.$$

818 We conclude from (D.1). □

819 **Lemma 19.** *Let  $B_t$  be a standard  $d$ -dimensional Brownian motion. For any  $u > 0$  and any*  
 820  *$t_1 > t_0 \geq 0$  with  $t_1 - t_0 = \eta > 0$ , we have*

$$\mathbb{P} \left( \sup_{t \in [t_0, t_1]} \|B_t - B_{t_1}\| \geq u \right) \leq 2^{1/4} e^{1/4} e^{-\frac{u^2}{4d\eta}}.$$

821 *Proof.* Also, by the time reversibility, stationarity of time increments of Brownian motion and Doob's  
 822 martingale inequality, for any  $\theta > 0$  so that  $2\theta\eta < 1$ , we have

$$\begin{aligned} \mathbb{P} \left( \sup_{t \in [t_0, t_1]} \|B_t - B_{t_1}\| \geq u \right) &= \mathbb{P} \left( \sup_{t \in [0, \eta]} \|B_t - B_0\| \geq u \right) \\ &\leq e^{-\theta u^2} \mathbb{E} \left[ e^{\theta \|B_\eta - B_0\|^2} \right] \\ &= e^{-\theta u^2} (1 - 2\theta\eta)^{-d/2}. \end{aligned}$$

823 By choosing  $\theta = 1/(4d\eta)$ , we get

$$\mathbb{P} \left( \sup_{t \in [t_0, t_1]} \|B_t - B_{t_1}\| \geq u \right) \leq \left( 1 - \frac{1}{2d} \right)^{-\frac{d}{2}} e^{-\frac{u^2}{4d\eta}}.$$

824 Note that for any  $x > 0$ ,  $(1 + \frac{1}{x})^x < e$ . Let us define  $x > 0$  via

$$1 - \frac{1}{2d} = \frac{1}{1+x}.$$

825 Then, we get  $d = \frac{1+x}{2x}$  and  $x = \frac{1}{1-\frac{1}{2d}} - 1 \leq 1$ , and

$$\left( 1 - \frac{1}{2d} \right)^{-\frac{d}{2}} = \left( \frac{1}{1+x} \right)^{-\frac{1+x}{4x}} = (1+x)^{\frac{1}{4}} (1+x)^{\frac{1}{4x}} \leq 2^{1/4} e^{1/4}.$$

826 Hence,

$$\mathbb{P} \left( \sup_{t \in [t_0, t_1]} \|B_t - B_{t_1}\| \geq u \right) \leq 2^{1/4} e^{1/4} e^{-\frac{u^2}{4d\eta}}.$$

827 □

828 **Lemma 20** (See Lemma 2 in [RRT17]). *If parts (i) and (ii) of Assumption 1 hold, then for all*  
 829  *$x \in \mathbb{R}^d$  and  $z \in \mathcal{Z}$ ,*

$$\|\nabla f(x, z)\| \leq M\|x\| + B,$$

830 and

$$\frac{m}{3}\|x\|^2 - \frac{b}{2} \log 3 \leq f(x, z) \leq \frac{M}{2}\|x\|^2 + B\|x\| + A.$$
